# Supplementary material for: Adaptation to acetaminophen exposure elicits major changes in expression and distribution of the hepatic proteome
Source: PubMed Central journal article supplement (PMC4660393; doi:10.1038/srep16423), 2015-11-26
Supplement: srep16423-s1.pdf [file srep16423-s1.pdf]

## **Adaptation to acetaminophen exposure elicits major changes in expression and distribution of the hepatic proteome**

Eakins R\*<sup>1</sup>, Walsh J\*<sup>1</sup>, Randle L\*<sup>2</sup>, Jenkins RE<sup>1</sup>, Schuppe-Koistinen I<sup>3</sup>, Rowe C<sup>1</sup>, Starkey Lewis P<sup>1</sup>, Vasieva O<sup>4</sup>, Prats N<sup>5</sup>, Auli M<sup>5</sup>, Bayliss M<sup>1</sup>, Webb S<sup>1</sup>, Rees, JA<sup>1</sup>, Kitteringham NR<sup>1</sup>, Goldring CE<sup>#1</sup>, Park BK<sup>1</sup>.

<sup>1</sup>MRC Centre for Drug Safety Science, University of Liverpool, Liverpool L69 3GE, UK

<sup>2</sup>Liverpool John Moores University, Byrom Street, Liverpool, L3 3AF, UK

<sup>3</sup>Almirall S. A. R&D Centre, Barcelona, Spain

<sup>4</sup>Institute of Integrative Biology, University of Liverpool, Liverpool, L69 7ZL, UK

<sup>5</sup>AstraZeneca R&D, Innovative Medicines, Personalised Healthcare & Biomarkers, Translational Science Centre, Science for Life Laboratory, Solna, Sweden

\*These authors contributed equally

#Corresponding author

**Supplementary Table 1A:** *i*TRAQ-based proteomic comparison of liver proteins in vehicle control- and APAP-treated rats (24h timepoint). Proteins with expression that was different (raw P < 0.05) between control and APAP-treated rats at 24h are listed. Mean expression values relative to a common pool are given for n=4 animals. Proteins are ordered according to the ratio between the 24h and control groups (lowest to highest) such that proteins with expression that was most markedly reduced at 24h appear at the top of the list.

<sup>a</sup>Average number of peptides used for quantification across the four individual iTRAQ runs.

<sup>b</sup>Uncorrected raw P value.

| Uniprot<br>Accession           | Name                                           | Peptides <sup>a</sup> | Vehicle<br>control |      | 24h  |      | 24h/ctrl<br>Ratio | P-value <sup>b</sup> |
|--------------------------------|------------------------------------------------|-----------------------|--------------------|------|------|------|-------------------|----------------------|
|                                |                                                |                       | Mean               | SD   | Mean | SD   |                   |                      |
| <b>Proteins reduced at 24h</b> |                                                |                       |                    |      |      |      |                   |                      |
| P49890                         | Estrogen sulfotransferase, isoform 6           | 18                    | 3.22               | 0.91 | 0.14 | 0.07 | 0.04              | <0.001               |
| P05369                         | Farnesyl pyrophosphate synthase                | 27                    | 1.50               | 0.39 | 0.62 | 0.21 | 0.42              | 0.009                |
| O35760                         | Isopentenyl-diphosphate Delta-isomerase 1      | 4                     | 1.38               | 0.41 | 0.69 | 0.27 | 0.50              | 0.035                |
| O88813                         | Long-chain-fatty-acid--CoA ligase 5            | 28                    | 1.89               | 0.67 | 0.97 | 0.31 | 0.52              | 0.036                |
| Q9ES38                         | Bile acyl-CoA synthetase                       | 26                    | 2.80               | 0.86 | 1.45 | 0.44 | 0.52              | 0.022                |
| P52847                         | Sulfotransferase family cytosolic 1B member 1  | 16                    | 1.97               | 0.42 | 1.06 | 0.43 | 0.54              | 0.025                |
| P36510                         | UDP-glucuronosyltransferase 2A1                | 3                     | 1.35               | 0.34 | 0.75 | 0.29 | 0.56              | 0.033                |
| P63174                         | 60S ribosomal protein L38                      | 5                     | 0.96               | 0.24 | 0.56 | 0.24 | 0.58              | 0.041                |
| Q9WUS0                         | Adenylate kinase isoenzyme 4, mitochondrial    | 14                    | 1.38               | 0.19 | 0.81 | 0.26 | 0.59              | 0.024                |
| Q4V8F9                         | Hydroxysteroid dehydrogenase-like protein 2    | 9                     | 0.95               | 0.24 | 0.56 | 0.16 | 0.59              | 0.041                |
| P15083                         | Polymeric immunoglobulin receptor              | 16                    | 1.20               | 0.24 | 0.73 | 0.10 | 0.61              | 0.007                |
| Q6AXX6                         | Redox-regulatory protein PAMM                  | 8                     | 1.54               | 0.33 | 0.94 | 0.10 | 0.61              | 0.010                |
| P16970                         | ATP-binding cassette sub-family D member 3     | 13                    | 1.69               | 0.46 | 1.03 | 0.07 | 0.61              | 0.018                |
| P02692                         | Fatty acid-binding protein, liver              | 69                    | 1.94               | 0.49 | 1.18 | 0.12 | 0.61              | 0.017                |
| P62271                         | 40S ribosomal protein S18                      | 13                    | 1.05               | 0.27 | 0.66 | 0.20 | 0.63              | 0.043                |
| P09527                         | Ras-related protein Rab-7a                     | 11                    | 0.96               | 0.11 | 0.61 | 0.09 | 0.63              | 0.003                |
| P00173                         | Cytochrome b5                                  | 31                    | 1.37               | 0.20 | 0.88 | 0.21 | 0.64              | 0.018                |
| P27605                         | Hypoxanthine-guanine phosphoribosyltransferase | 12                    | 1.35               | 0.20 | 0.87 | 0.18 | 0.64              | 0.012                |
| Q7TQM4                         | Sterol O-acyltransferase 2                     | 5                     | 1.32               | 0.32 | 0.87 | 0.15 | 0.66              | 0.034                |

|                                  |                                                            |     |      |      |      |      |      |       |
|----------------------------------|------------------------------------------------------------|-----|------|------|------|------|------|-------|
| <b>P29411</b>                    | GTP:AMP phosphotransferase, mitochondrial                  | 7   | 1.41 | 0.24 | 0.94 | 0.28 | 0.66 | 0.049 |
| <b>P54921</b>                    | Alpha-soluble NSF attachment protein                       | 10  | 1.22 | 0.29 | 0.81 | 0.07 | 0.66 | 0.023 |
| <b>P10867</b>                    | L-gulonolactone oxidase                                    | 18  | 2.00 | 0.36 | 1.35 | 0.29 | 0.67 | 0.030 |
| <b>P97612</b>                    | Fatty-acid amide hydrolase 1                               | 26  | 1.67 | 0.31 | 1.15 | 0.20 | 0.69 | 0.033 |
| <b>P57093</b>                    | Phytanoyl-CoA dioxygenase, peroxisomal                     | 10  | 1.36 | 0.22 | 0.95 | 0.21 | 0.70 | 0.040 |
| <b>Q5XIM9</b>                    | T-complex protein 1 subunit beta                           | 31  | 0.97 | 0.08 | 0.68 | 0.09 | 0.70 | 0.004 |
| <b>P11507</b>                    | Sarcoplasmic/endoplasmic reticulum calcium ATPase 2        | 30  | 1.01 | 0.10 | 0.75 | 0.09 | 0.74 | 0.007 |
| <b>P50237</b>                    | Sulfotransferase 1C1                                       | 27  | 1.95 | 0.15 | 1.44 | 0.30 | 0.74 | 0.029 |
| <b>Q9WUW9</b>                    | Sulfotransferase 1C2A                                      | 5   | 1.20 | 0.17 | 0.89 | 0.09 | 0.74 | 0.015 |
| <b>P04646</b>                    | 60S ribosomal protein L35a                                 | 3   | 1.04 | 0.06 | 0.78 | 0.16 | 0.75 | 0.041 |
| <b>O88941</b>                    | Mannosyl-oligosaccharide glucosidase                       | 12  | 1.12 | 0.13 | 0.85 | 0.08 | 0.76 | 0.008 |
| <b>Q68FP2</b>                    | Serum paraoxonase/lactonase 3                              | 16  | 1.43 | 0.10 | 1.09 | 0.15 | 0.76 | 0.011 |
| <b>P29314</b>                    | 40S ribosomal protein S9                                   | 13  | 0.86 | 0.10 | 0.65 | 0.05 | 0.76 | 0.009 |
| <b>P06214</b>                    | Delta-aminolevulinic acid dehydratase                      | 35  | 1.50 | 0.26 | 1.15 | 0.08 | 0.76 | 0.027 |
| <b>P97562</b>                    | Peroxisomal acyl-coenzyme A oxidase 2                      | 38  | 1.45 | 0.15 | 1.13 | 0.15 | 0.78 | 0.029 |
| <b>Q03336</b>                    | Regucalcin                                                 | 45  | 1.98 | 0.18 | 1.54 | 0.25 | 0.78 | 0.030 |
| <b>P85108</b>                    | Tubulin beta-2A chain                                      | 72  | 1.11 | 0.05 | 0.87 | 0.06 | 0.78 | 0.001 |
| <b>P18445</b>                    | 60S ribosomal protein L27a                                 | 9   | 0.86 | 0.08 | 0.68 | 0.08 | 0.79 | 0.023 |
| <b>Q5XI32</b>                    | F-actin-capping protein subunit beta                       | 11  | 1.03 | 0.11 | 0.82 | 0.12 | 0.80 | 0.045 |
| <b>P61107</b>                    | Ras-related protein Rab-14                                 | 9   | 1.11 | 0.14 | 0.89 | 0.04 | 0.80 | 0.016 |
| <b>Q497B0</b>                    | Omega-amidase NIT2                                         | 34  | 1.58 | 0.09 | 1.28 | 0.13 | 0.81 | 0.013 |
| <b>P41562</b>                    | Isocitrate dehydrogenase [NADP] cytoplasmic                | 59  | 1.21 | 0.08 | 1.00 | 0.07 | 0.82 | 0.007 |
| <b>Q920J4</b>                    | Thioredoxin-like protein 1                                 | 8   | 1.12 | 0.11 | 0.94 | 0.06 | 0.84 | 0.026 |
| <b>Q68FS4</b>                    | Cytosol aminopeptidase                                     | 53  | 1.52 | 0.14 | 1.33 | 0.06 | 0.88 | 0.044 |
| <b>Proteins increased at 24h</b> |                                                            |     |      |      |      |      |      |       |
| <b>P08541</b>                    | UDP-glucuronosyltransferase 2B2                            | 37  | 0.46 | 0.87 | 2.34 | 0.85 | 5.05 | 0.020 |
| <b>P02091</b>                    | Hemoglobin subunit beta-1                                  | 179 | 0.44 | 0.20 | 2.03 | 1.54 | 4.58 | 0.029 |
| <b>P38918</b>                    | Aflatoxin B1 aldehyde reductase member 3                   | 42  | 0.20 | 0.17 | 0.69 | 0.31 | 3.40 | 0.024 |
| <b>P13221</b>                    | Aspartate aminotransferase, cytoplasmic                    | 30  | 0.51 | 0.20 | 1.35 | 0.49 | 2.66 | 0.010 |
| <b>Q62651</b>                    | Delta(3,5)-Delta(2,4)-dienoyl-CoA isomerase, mitochondrial | 17  | 0.62 | 0.20 | 1.59 | 0.44 | 2.55 | 0.005 |
| <b>O70199</b>                    | UDP-glucose 6-dehydrogenase                                | 38  | 0.32 | 0.10 | 0.77 | 0.16 | 2.42 | 0.003 |
| <b>P06866</b>                    | Haptoglobin                                                | 21  | 0.33 | 0.15 | 0.77 | 0.28 | 2.35 | 0.033 |
| <b>O09171</b>                    | Betaine--homocysteine S-methyltransferase 1                | 123 | 1.06 | 0.39 | 2.49 | 1.05 | 2.35 | 0.028 |

|               |                                                  |     |      |      |      |      |      |       |
|---------------|--------------------------------------------------|-----|------|------|------|------|------|-------|
| <b>P09034</b> | Argininosuccinate synthase                       | 95  | 0.70 | 0.51 | 1.62 | 0.48 | 2.32 | 0.045 |
| <b>P08649</b> | Complement C4                                    | 30  | 0.52 | 0.34 | 1.20 | 0.15 | 2.31 | 0.046 |
| <b>P23562</b> | Band 3 anion transport protein                   | 17  | 0.90 | 0.23 | 2.02 | 0.98 | 2.24 | 0.033 |
| <b>P27139</b> | Carbonic anhydrase 2                             | 18  | 0.68 | 0.32 | 1.52 | 0.49 | 2.23 | 0.032 |
| <b>P20059</b> | Hemopexin                                        | 24  | 0.45 | 0.12 | 0.98 | 0.25 | 2.16 | 0.007 |
| <b>P13255</b> | Glycine N-methyltransferase                      | 37  | 0.86 | 0.37 | 1.83 | 0.71 | 2.14 | 0.044 |
| <b>Q68FT5</b> | Betaine--homocysteine S-methyltransferase 2      | 82  | 0.99 | 0.45 | 2.08 | 0.57 | 2.10 | 0.028 |
| <b>P48508</b> | Glutamate--cysteine ligase regulatory subunit    | 9   | 0.68 | 0.26 | 1.39 | 0.40 | 2.05 | 0.041 |
| <b>P05182</b> | Cytochrome P450 2E1                              | 29  | 0.89 | 0.14 | 1.74 | 0.48 | 1.96 | 0.006 |
| <b>Q6URK4</b> | Heterogeneous nuclear ribonucleoprotein A3       | 20  | 0.56 | 0.07 | 0.99 | 0.29 | 1.76 | 0.027 |
| <b>Q63416</b> | Inter-alpha-trypsin inhibitor heavy chain H3     | 10  | 0.81 | 0.25 | 1.31 | 0.25 | 1.62 | 0.036 |
| <b>P20817</b> | Cytochrome P450 4A14                             | 23  | 1.06 | 0.19 | 1.71 | 0.45 | 1.61 | 0.030 |
| <b>Q58FK9</b> | Kynurenine--oxoglutarate transaminase 3          | 23  | 1.01 | 0.27 | 1.61 | 0.18 | 1.59 | 0.011 |
| <b>P13635</b> | Ceruloplasmin                                    | 19  | 0.67 | 0.20 | 1.05 | 0.07 | 1.57 | 0.031 |
| <b>P25409</b> | Alanine aminotransferase 1                       | 19  | 0.85 | 0.09 | 1.13 | 0.14 | 1.32 | 0.018 |
| <b>Q63584</b> | Transmembrane emp24 domain-containing protein 10 | 11  | 0.90 | 0.07 | 1.17 | 0.21 | 1.31 | 0.038 |
| <b>P38062</b> | Methionine aminopeptidase 2                      | 2   | 0.87 | 0.12 | 1.11 | 0.16 | 1.28 | 0.049 |
| <b>P21571</b> | ATP synthase-coupling factor 6, mitochondrial    | 13  | 0.93 | 0.09 | 1.17 | 0.17 | 1.25 | 0.045 |
| <b>P85834</b> | Elongation factor Tu, mitochondrial              | 26  | 1.01 | 0.12 | 1.23 | 0.13 | 1.22 | 0.045 |
| <b>P63086</b> | Mitogen-activated protein kinase 1               | 5   | 0.83 | 0.08 | 1.00 | 0.11 | 1.21 | 0.041 |
| <b>Q9Z1W6</b> | Protein LYRIC                                    | 7   | 1.17 | 0.14 | 1.38 | 0.06 | 1.18 | 0.037 |
| <b>P02770</b> | Serum albumin                                    | 193 | 0.97 | 0.04 | 1.10 | 0.08 | 1.13 | 0.026 |

**Supplementary Table 1B:** *i*TRAQ-based proteomic comparison of liver proteins in vehicle control- and APAP-treated rats (48h timepoint). Proteins with expression that was different (raw P < 0.05) between control and APAP-treated rats at 48h are listed. Mean expression values relative to a common pool are given for n=4 animals. Proteins are ordered according to the ratio between the 48h and control groups (lowest to highest) such that proteins with expression that was most markedly reduced at 48h appear at the top of the list.

<sup>a</sup>Average number of peptides used for quantification across the four individual iTRAQ runs.

<sup>b</sup>Uncorrected raw P value.

| Uniprot<br>Accession           | Name                                                     | Peptides <sup>a</sup> | Vehicle<br>control |      | 48h  |      | 48h/ctrl | P-<br>value <sup>b</sup> |
|--------------------------------|----------------------------------------------------------|-----------------------|--------------------|------|------|------|----------|--------------------------|
|                                |                                                          |                       | Mean               | SD   | Mean | SD   | Ratio    |                          |
| <b>Proteins reduced at 48h</b> |                                                          |                       |                    |      |      |      |          |                          |
| P49890                         | Estrogen sulfotransferase,<br>isoform 6                  | 18                    | 3.22               | 0.91 | 0.27 | 0.17 | 0.08     | 0.001                    |
| P05183                         | Cytochrome P450 3A2                                      | 15                    | 2.49               | 0.97 | 0.29 | 0.23 | 0.12     | 0.001                    |
| P08683                         | Cytochrome P450 2C11                                     | 51                    | 2.53               | 0.52 | 0.38 | 0.23 | 0.15     | 0.001                    |
| P09606                         | Glutamine synthetase                                     | 17                    | 2.73               | 0.78 | 0.47 | 0.30 | 0.17     | 0.011                    |
| P08010                         | Glutathione S-transferase<br>Mu 2                        | 70                    | 1.42               | 0.86 | 0.31 | 0.15 | 0.22     | 0.022                    |
| Q9ES38                         | Bile acyl-CoA synthetase                                 | 26                    | 2.80               | 0.86 | 0.62 | 0.24 | 0.22     | 0.001                    |
| P02761                         | Major urinary protein                                    | 22                    | 2.27               | 0.42 | 0.52 | 0.23 | 0.23     | <0.001                   |
| P10867                         | L-gulonolactone oxidase                                  | 18                    | 2.00               | 0.36 | 0.48 | 0.09 | 0.24     | <0.001                   |
| P16232                         | Corticosteroid 11-beta-<br>dehydrogenase isozyme 1       | 21                    | 2.55               | 0.83 | 0.62 | 0.31 | 0.24     | 0.006                    |
| P02692                         | Fatty acid-binding protein,<br>liver                     | 69                    | 1.94               | 0.49 | 0.48 | 0.32 | 0.25     | 0.003                    |
| P52847                         | Sulfotransferase family<br>cytosolic 1B member 1         | 16                    | 1.97               | 0.42 | 0.51 | 0.15 | 0.26     | <0.001                   |
| Q8VHE9                         | All-trans-retinol 13,14-<br>reductase                    | 10                    | 1.54               | 0.84 | 0.40 | 0.20 | 0.26     | 0.009                    |
| P55051                         | Fatty acid-binding protein,<br>brain                     | 9                     | 1.61               | 0.57 | 0.42 | 0.47 | 0.26     | 0.037                    |
| P24470                         | Cytochrome P450 2C23                                     | 25                    | 1.53               | 0.32 | 0.41 | 0.23 | 0.26     | 0.004                    |
| P13107                         | Cytochrome P450 2B3                                      | 27                    | 1.48               | 0.55 | 0.40 | 0.52 | 0.27     | 0.033                    |
| P18163                         | Long-chain-fatty-acid--CoA<br>ligase 1                   | 78                    | 1.54               | 0.13 | 0.41 | 0.16 | 0.27     | 0.001                    |
| P50237                         | Sulfotransferase 1C1                                     | 27                    | 1.95               | 0.15 | 0.53 | 0.20 | 0.27     | <0.001                   |
| P36365                         | Dimethylaniline<br>monooxygenase [N-oxide-<br>forming] 1 | 13                    | 2.34               | 0.94 | 0.64 | 0.17 | 0.27     | 0.002                    |
| Q03336                         | Regucalcin                                               | 45                    | 1.98               | 0.18 | 0.55 | 0.06 | 0.28     | <0.001                   |
| O88813                         | Long-chain-fatty-acid--CoA<br>ligase 5                   | 28                    | 1.89               | 0.67 | 0.53 | 0.30 | 0.28     | 0.007                    |
| Q64638                         | UDP-<br>glucuronosyltransferase 1-5                      | 25                    | 3.79               | 1.58 | 1.08 | 0.77 | 0.28     | 0.009                    |
| P30839                         | Fatty aldehyde<br>dehydrogenase                          | 36                    | 1.74               | 0.55 | 0.50 | 0.08 | 0.29     | 0.001                    |

|               |                                                                          |     |      |      |      |      |      |        |
|---------------|--------------------------------------------------------------------------|-----|------|------|------|------|------|--------|
| <b>P17988</b> | Sulfotransferase 1A1                                                     | 30  | 1.99 | 0.34 | 0.58 | 0.09 | 0.29 | <0.001 |
| <b>P05178</b> | Cytochrome P450 2C6                                                      | 20  | 1.67 | 0.62 | 0.50 | 0.24 | 0.30 | 0.009  |
| <b>P14141</b> | Carbonic anhydrase 3                                                     | 70  | 1.99 | 1.30 | 0.59 | 0.26 | 0.30 | 0.046  |
| <b>P09811</b> | Glycogen phosphorylase, liver form                                       | 76  | 1.40 | 0.26 | 0.43 | 0.13 | 0.31 | 0.001  |
| <b>P00502</b> | Glutathione S-transferase alpha-1                                        | 51  | 1.57 | 1.21 | 0.50 | 0.35 | 0.32 | 0.050  |
| <b>P12928</b> | Pyruvate kinase isozymes R/L                                             | 61  | 1.64 | 0.53 | 0.55 | 0.19 | 0.34 | 0.003  |
| <b>Q64232</b> | Very-long-chain enoyl-CoA reductase                                      | 35  | 1.76 | 0.41 | 0.60 | 0.22 | 0.34 | 0.003  |
| <b>O35077</b> | Glycerol-3-phosphate dehydrogenase [NAD+], cytoplasmic                   | 39  | 1.45 | 0.42 | 0.51 | 0.07 | 0.35 | 0.001  |
| <b>Q64611</b> | Cysteine sulfinic acid decarboxylase                                     | 25  | 1.81 | 0.70 | 0.64 | 0.15 | 0.35 | 0.003  |
| <b>P05182</b> | Cytochrome P450 2E1                                                      | 29  | 0.89 | 0.14 | 0.32 | 0.17 | 0.36 | 0.013  |
| <b>P15865</b> | Histone H1.4                                                             | 19  | 1.04 | 0.35 | 0.38 | 0.12 | 0.36 | 0.008  |
| <b>P31210</b> | 3-oxo-5-beta-steroid 4-dehydrogenase                                     | 51  | 1.07 | 0.22 | 0.39 | 0.30 | 0.36 | 0.014  |
| <b>Q5U2Q3</b> | Ester hydrolase C11orf54 homolog                                         | 12  | 2.00 | 0.36 | 0.74 | 0.38 | 0.37 | 0.006  |
| <b>Q497B0</b> | Omega-amidase NIT2                                                       | 34  | 1.58 | 0.09 | 0.59 | 0.13 | 0.37 | <0.001 |
| <b>P04799</b> | Cytochrome P450 1A2                                                      | 7   | 1.32 | 0.36 | 0.49 | 0.48 | 0.37 | 0.024  |
| <b>Q6AYT9</b> | Acyl-coenzyme A synthetase ACSM5, mitochondrial                          | 14  | 1.53 | 0.30 | 0.57 | 0.17 | 0.37 | 0.001  |
| <b>Q07071</b> | Glucokinase regulatory protein                                           | 27  | 1.71 | 0.64 | 0.65 | 0.23 | 0.38 | 0.015  |
| <b>P43278</b> | Histone H1.0                                                             | 4   | 1.51 | 0.31 | 0.58 | 0.19 | 0.38 | 0.003  |
| <b>P16638</b> | ATP-citrate synthase                                                     | 65  | 1.93 | 0.71 | 0.74 | 0.12 | 0.38 | 0.003  |
| <b>Q4KLPO</b> | Probable 2-oxoglutarate dehydrogenase E1 component DHKTD1, mitochondrial | 35  | 1.59 | 0.56 | 0.61 | 0.22 | 0.39 | 0.006  |
| <b>P15149</b> | Cytochrome P450 2A2                                                      | 35  | 1.28 | 0.09 | 0.50 | 0.07 | 0.39 | <0.001 |
| <b>P97612</b> | Fatty-acid amide hydrolase 1                                             | 26  | 1.67 | 0.31 | 0.65 | 0.19 | 0.39 | 0.002  |
| <b>P18757</b> | Cystathionine gamma-lyase                                                | 37  | 1.40 | 0.63 | 0.55 | 0.21 | 0.39 | 0.021  |
| <b>P19112</b> | Fructose-1,6-bisphosphatase 1                                            | 72  | 1.71 | 0.38 | 0.67 | 0.16 | 0.39 | 0.002  |
| <b>Q5PPL3</b> | Sterol-4-alpha-carboxylate 3-dehydrogenase, decarboxylating              | 20  | 1.74 | 0.46 | 0.69 | 0.25 | 0.40 | 0.008  |
| <b>P05545</b> | Serine protease inhibitor A3K                                            | 34  | 1.50 | 0.50 | 0.60 | 0.28 | 0.40 | 0.016  |
| <b>P00884</b> | Fructose-bisphosphate aldolase B                                         | 129 | 1.31 | 0.33 | 0.52 | 0.16 | 0.40 | 0.005  |
| <b>Q64550</b> | UDP-glucuronosyltransferase 1-1                                          | 29  | 1.54 | 0.70 | 0.62 | 0.21 | 0.40 | 0.016  |
| <b>P29147</b> | D-beta-hydroxybutyrate dehydrogenase, mitochondrial                      | 42  | 1.40 | 0.23 | 0.56 | 0.18 | 0.40 | 0.002  |
| <b>P33274</b> | Cytochrome P450 4F1                                                      | 14  | 1.35 | 0.35 | 0.55 | 0.28 | 0.41 | 0.029  |
| <b>P27867</b> | Sorbitol dehydrogenase                                                   | 26  | 1.21 | 0.44 | 0.50 | 0.10 | 0.41 | 0.011  |

|                |                                                                              |     |      |      |      |      |      |        |
|----------------|------------------------------------------------------------------------------|-----|------|------|------|------|------|--------|
| <b>Q02253</b>  | Methylmalonate-semialdehyde dehydrogenase [acylating], mitochondrial         | 124 | 1.22 | 0.24 | 0.51 | 0.06 | 0.42 | <0.001 |
| <b>Q9Z339</b>  | Glutathione S-transferase omega-1                                            | 10  | 1.42 | 0.40 | 0.59 | 0.32 | 0.42 | 0.025  |
| <b>P55159</b>  | Serum paraoxonase/arylesterase 1                                             | 17  | 1.68 | 0.55 | 0.71 | 0.06 | 0.42 | 0.003  |
| <b>P17764</b>  | Acetyl-CoA acetyltransferase, mitochondrial                                  | 60  | 1.28 | 0.07 | 0.54 | 0.26 | 0.42 | 0.014  |
| <b>Q63357</b>  | Myosin-IId                                                                   | 93  | 1.01 | 0.12 | 0.43 | 0.22 | 0.42 | 0.014  |
| <b>Q4KLZ6</b>  | Bifunctional ATP-dependent dihydroxyacetone kinase/FAD-AMP lyase (cyclizing) | 64  | 1.70 | 0.39 | 0.72 | 0.23 | 0.43 | 0.005  |
| <b>Q6AYT0</b>  | Quinone oxidoreductase                                                       | 9   | 1.37 | 0.36 | 0.59 | 0.21 | 0.43 | 0.017  |
| <b>Q07523</b>  | Hydroxyacid oxidase 2                                                        | 8   | 1.99 | 0.34 | 0.87 | 0.24 | 0.44 | 0.002  |
| <b>P16303</b>  | Carboxylesterase 3                                                           | 33  | 1.85 | 0.85 | 0.81 | 0.19 | 0.44 | 0.030  |
| <b>P22791</b>  | Hydroxymethylglutaryl-CoA synthase, mitochondrial                            | 106 | 1.46 | 0.40 | 0.65 | 0.26 | 0.44 | 0.010  |
| <b>Q62730</b>  | Estradiol 17-beta-dehydrogenase 2                                            | 17  | 1.72 | 0.47 | 0.76 | 0.36 | 0.44 | 0.034  |
| <b>P13803</b>  | Electron transfer flavoprotein subunit alpha, mitochondrial                  | 50  | 1.29 | 0.23 | 0.59 | 0.25 | 0.46 | 0.011  |
| <b>Q63150</b>  | Dihydropyrimidinase                                                          | 29  | 1.41 | 0.17 | 0.64 | 0.32 | 0.46 | 0.020  |
| <b>P24329</b>  | Thiosulfate sulfurtransferase                                                | 41  | 1.33 | 0.20 | 0.61 | 0.08 | 0.46 | <0.001 |
| <b>P46953</b>  | 3-hydroxyanthranilate 3,4-dioxygenase                                        | 25  | 1.42 | 0.40 | 0.66 | 0.06 | 0.47 | 0.003  |
| <b>Q6DGG1</b>  | Alpha/beta hydrolase domain-containing protein 14B                           | 12  | 1.36 | 0.25 | 0.64 | 0.14 | 0.47 | 0.002  |
| <b>P57113</b>  | Maleylacetoacetate isomerase                                                 | 36  | 1.58 | 0.34 | 0.74 | 0.14 | 0.47 | 0.002  |
| <b>P97532</b>  | 3-mercaptopyruvate sulfurtransferase                                         | 23  | 1.27 | 0.28 | 0.61 | 0.09 | 0.48 | 0.001  |
| <b>Q5FVQ4</b>  | Malectin                                                                     | 8   | 1.39 | 0.58 | 0.67 | 0.31 | 0.48 | 0.043  |
| <b>P52759</b>  | Ribonuclease UK114                                                           | 51  | 1.29 | 0.41 | 0.62 | 0.23 | 0.48 | 0.035  |
| <b>P02696</b>  | Retinol-binding protein 1                                                    | 13  | 1.29 | 0.23 | 0.62 | 0.15 | 0.48 | 0.003  |
| <b>P22734</b>  | Catechol O-methyltransferase                                                 | 46  | 1.49 | 0.39 | 0.72 | 0.22 | 0.48 | 0.009  |
| <b>P08011</b>  | Microsomal glutathione S-transferase 1                                       | 25  | 1.57 | 0.62 | 0.76 | 0.34 | 0.48 | 0.044  |
| <b>A0J PQ8</b> | Alkylglycerol monooxygenase                                                  | 6   | 1.64 | 0.20 | 0.80 | 0.12 | 0.49 | <0.001 |
| <b>Q498D5</b>  | Regulator of microtubule dynamics protein 2                                  | 8   | 1.34 | 0.14 | 0.65 | 0.21 | 0.49 | 0.003  |
| <b>P30713</b>  | Glutathione S-transferase theta-2                                            | 19  | 1.34 | 0.31 | 0.65 | 0.10 | 0.49 | 0.002  |
| <b>Q9QZX8</b>  | Solute carrier organic anion transporter family member 1B2                   | 3   | 1.36 | 0.40 | 0.67 | 0.19 | 0.49 | 0.009  |

|               |                                                                                                          |     |      |      |      |      |      |        |
|---------------|----------------------------------------------------------------------------------------------------------|-----|------|------|------|------|------|--------|
| <b>Q7TP52</b> | Carboxymethylenebutenolidase homolog                                                                     | 16  | 1.79 | 0.45 | 0.88 | 0.32 | 0.49 | 0.018  |
| <b>P27605</b> | Hypoxanthine-guanine phosphoribosyltransferase                                                           | 12  | 1.35 | 0.20 | 0.66 | 0.12 | 0.49 | 0.001  |
| <b>P25093</b> | Fumarylacetoacetase                                                                                      | 48  | 1.45 | 0.12 | 0.71 | 0.12 | 0.49 | <0.001 |
| <b>Q02974</b> | Ketohexokinase                                                                                           | 25  | 1.56 | 0.28 | 0.77 | 0.07 | 0.50 | <0.001 |
| <b>Q5BK17</b> | Iodotyrosine dehalogenase 1                                                                              | 4   | 1.75 | 0.28 | 0.87 | 0.22 | 0.50 | 0.004  |
| <b>P57093</b> | Phytanoyl-CoA dioxygenase, peroxisomal                                                                   | 10  | 1.36 | 0.22 | 0.68 | 0.18 | 0.50 | 0.004  |
| <b>Q66HG4</b> | Aldose 1-epimerase                                                                                       | 5   | 1.37 | 0.18 | 0.70 | 0.27 | 0.51 | 0.008  |
| <b>P46720</b> | Solute carrier organic anion transporter family member 1A1                                               | 4   | 1.41 | 0.30 | 0.72 | 0.10 | 0.51 | 0.003  |
| <b>Q63060</b> | Glycerol kinase                                                                                          | 20  | 1.68 | 0.28 | 0.87 | 0.19 | 0.51 | 0.002  |
| <b>Q68FP2</b> | Serum paraoxonase/lactonase 3                                                                            | 16  | 1.43 | 0.10 | 0.74 | 0.11 | 0.51 | <0.001 |
| <b>P10760</b> | Adenosylhomocysteinase                                                                                   | 54  | 1.29 | 0.20 | 0.67 | 0.25 | 0.51 | 0.011  |
| <b>P23680</b> | Serum amyloid P-component                                                                                | 4   | 1.61 | 0.24 | 0.83 | 0.08 | 0.52 | <0.001 |
| <b>P23457</b> | 3-alpha-hydroxysteroid dehydrogenase                                                                     | 48  | 1.51 | 0.36 | 0.78 | 0.33 | 0.52 | 0.048  |
| <b>P10860</b> | Glutamate dehydrogenase 1, mitochondrial                                                                 | 118 | 1.63 | 0.34 | 0.84 | 0.15 | 0.52 | 0.005  |
| <b>Q64581</b> | Cytochrome P450 3A18                                                                                     | 8   | 1.50 | 0.57 | 0.78 | 0.17 | 0.52 | 0.019  |
| <b>P06214</b> | Delta-aminolevulinic acid dehydratase                                                                    | 35  | 1.50 | 0.26 | 0.78 | 0.14 | 0.52 | 0.002  |
| <b>B0BNE5</b> | S-formylglutathione hydrolase                                                                            | 23  | 1.32 | 0.33 | 0.69 | 0.25 | 0.52 | 0.020  |
| <b>Q562C4</b> | Methyltransferase-like protein 7B                                                                        | 8   | 1.63 | 0.70 | 0.85 | 0.17 | 0.52 | 0.028  |
| <b>P08461</b> | Dihydrolipoyllysine-residue acetyltransferase component of pyruvate dehydrogenase complex, mitochondrial | 11  | 1.13 | 0.26 | 0.59 | 0.06 | 0.52 | 0.005  |
| <b>P41562</b> | Isocitrate dehydrogenase [NADP] cytoplasmic                                                              | 59  | 1.21 | 0.08 | 0.63 | 0.15 | 0.52 | 0.002  |
| <b>Q63270</b> | Cytoplasmic aconitate hydratase                                                                          | 36  | 1.21 | 0.20 | 0.64 | 0.21 | 0.52 | 0.010  |
| <b>P70712</b> | Kynureninase                                                                                             | 19  | 1.41 | 0.32 | 0.74 | 0.13 | 0.52 | 0.005  |
| <b>Q510M2</b> | Nicotinate-nucleotide pyrophosphorylase [carboxylating]                                                  | 11  | 1.28 | 0.42 | 0.67 | 0.27 | 0.53 | 0.041  |
| <b>P62959</b> | Histidine triad nucleotide-binding protein 1                                                             | 8   | 1.59 | 0.36 | 0.84 | 0.20 | 0.53 | 0.008  |
| <b>Q9WUS0</b> | Adenylate kinase isoenzyme 4, mitochondrial                                                              | 14  | 1.38 | 0.19 | 0.73 | 0.38 | 0.53 | 0.026  |
| <b>O89000</b> | Dihydropyrimidine dehydrogenase [NADP+]                                                                  | 12  | 1.36 | 0.32 | 0.72 | 0.32 | 0.53 | 0.030  |
| <b>P00173</b> | Cytochrome b5                                                                                            | 31  | 1.37 | 0.20 | 0.73 | 0.30 | 0.53 | 0.020  |
| <b>P10868</b> | Guanidinoacetate N-methyltransferase                                                                     | 16  | 1.58 | 0.51 | 0.85 | 0.15 | 0.53 | 0.018  |
| <b>Q6P6R2</b> | Dihydrolipoyl dehydrogenase, mitochondrial                                                               | 25  | 1.16 | 0.23 | 0.62 | 0.23 | 0.54 | 0.023  |



|               |                                                                         |     |      |      |      |      |      |        |
|---------------|-------------------------------------------------------------------------|-----|------|------|------|------|------|--------|
| <b>P11915</b> | Non-specific lipid-transfer protein                                     | 31  | 1.23 | 0.23 | 0.66 | 0.31 | 0.54 | 0.049  |
| <b>Q03248</b> | Beta-ureidopropionase                                                   | 30  | 1.21 | 0.25 | 0.66 | 0.11 | 0.54 | 0.005  |
| <b>P11884</b> | Aldehyde dehydrogenase, mitochondrial                                   | 98  | 1.17 | 0.24 | 0.64 | 0.16 | 0.55 | 0.011  |
| <b>P04762</b> | Catalase                                                                | 160 | 1.35 | 0.36 | 0.74 | 0.27 | 0.55 | 0.038  |
| <b>P0C2X9</b> | Delta-1-pyrroline-5-carboxylate dehydrogenase, mitochondrial            | 43  | 1.30 | 0.10 | 0.71 | 0.09 | 0.55 | <0.001 |
| <b>P11348</b> | Dihydropteridine reductase                                              | 27  | 1.29 | 0.44 | 0.71 | 0.15 | 0.55 | 0.039  |
| <b>Q9WVK7</b> | Hydroxyacyl-coenzyme A dehydrogenase, mitochondrial                     | 54  | 1.22 | 0.31 | 0.68 | 0.18 | 0.55 | 0.026  |
| <b>P10634</b> | Cytochrome P450 2D26                                                    | 57  | 1.53 | 0.31 | 0.85 | 0.25 | 0.56 | 0.022  |
| <b>P12938</b> | Cytochrome P450 2D3                                                     | 46  | 1.52 | 0.33 | 0.85 | 0.17 | 0.56 | 0.010  |
| <b>P38652</b> | Phosphoglucomutase-1                                                    | 58  | 1.05 | 0.17 | 0.59 | 0.13 | 0.56 | 0.007  |
| <b>P51869</b> | Cytochrome P450 4F4                                                     | 14  | 1.42 | 0.51 | 0.80 | 0.05 | 0.56 | 0.038  |
| <b>P19643</b> | Amine oxidase [flavin-containing] B                                     | 29  | 1.30 | 0.32 | 0.74 | 0.03 | 0.56 | 0.003  |
| <b>Q5FVQ8</b> | NLR family member X1                                                    | 9   | 1.14 | 0.25 | 0.65 | 0.26 | 0.57 | 0.046  |
| <b>P84817</b> | Mitochondrial fission 1 protein                                         | 2   | 1.28 | 0.25 | 0.74 | 0.09 | 0.58 | 0.004  |
| <b>P07953</b> | 6-phosphofructo-2-kinase/fructose-2,6-bisphosphatase 1                  | 13  | 1.47 | 0.11 | 0.85 | 0.09 | 0.58 | <0.001 |
| <b>P97524</b> | Very long-chain acyl-CoA synthetase                                     | 34  | 1.53 | 0.35 | 0.89 | 0.25 | 0.58 | 0.021  |
| <b>P07896</b> | Peroxisomal bifunctional enzyme                                         | 45  | 1.24 | 0.32 | 0.72 | 0.22 | 0.58 | 0.038  |
| <b>Q5XIC0</b> | Enoyl-CoA delta isomerase 2, mitochondrial                              | 14  | 1.20 | 0.24 | 0.71 | 0.24 | 0.59 | 0.046  |
| <b>Q5HZY2</b> | GTP-binding protein SAR1b                                               | 13  | 1.22 | 0.23 | 0.72 | 0.11 | 0.59 | 0.004  |
| <b>Q0VGK3</b> | Glycerate kinase                                                        | 16  | 1.22 | 0.15 | 0.72 | 0.29 | 0.59 | 0.043  |
| <b>P38718</b> | Mitochondrial pyruvate carrier 2/Brain protein 44                       | 3   | 1.35 | 0.43 | 0.79 | 0.18 | 0.59 | 0.041  |
| <b>P16617</b> | Phosphoglycerate kinase 1                                               | 54  | 1.09 | 0.24 | 0.65 | 0.19 | 0.59 | 0.031  |
| <b>P00481</b> | Ornithine carbamoyltransferase, mitochondrial                           | 57  | 1.30 | 0.19 | 0.77 | 0.12 | 0.59 | 0.003  |
| <b>P81155</b> | Voltage-dependent anion-selective channel protein 2                     | 10  | 1.09 | 0.22 | 0.65 | 0.24 | 0.59 | 0.039  |
| <b>Q68FS4</b> | Cytosol aminopeptidase                                                  | 53  | 1.52 | 0.14 | 0.90 | 0.19 | 0.59 | 0.003  |
| <b>P48500</b> | Triosephosphate isomerase                                               | 33  | 1.17 | 0.32 | 0.69 | 0.22 | 0.59 | 0.040  |
| <b>Q68FU3</b> | Electron transfer flavoprotein subunit beta                             | 29  | 1.17 | 0.22 | 0.70 | 0.20 | 0.60 | 0.025  |
| <b>P00507</b> | Aspartate aminotransferase, mitochondrial                               | 73  | 1.07 | 0.15 | 0.64 | 0.19 | 0.60 | 0.016  |
| <b>Q6UPE1</b> | Electron transfer flavoprotein-ubiquinone oxidoreductase, mitochondrial | 36  | 1.12 | 0.12 | 0.67 | 0.07 | 0.60 | 0.001  |
| <b>P51635</b> | Alcohol dehydrogenase [NADP+]                                           | 24  | 1.25 | 0.27 | 0.75 | 0.15 | 0.60 | 0.014  |

|               |                                                                          |    |      |      |      |      |      |        |
|---------------|--------------------------------------------------------------------------|----|------|------|------|------|------|--------|
| <b>P27364</b> | 3 beta-hydroxysteroid dehydrogenase type 5                               | 19 | 1.41 | 0.31 | 0.85 | 0.06 | 0.60 | 0.004  |
| <b>Q6P6V0</b> | Glucose-6-phosphate isomerase                                            | 32 | 1.23 | 0.31 | 0.74 | 0.15 | 0.60 | 0.025  |
| <b>Q9QZH8</b> | Arylacetamide deacetylase                                                | 6  | 1.64 | 0.55 | 0.99 | 0.15 | 0.60 | 0.034  |
| <b>Q6AXX6</b> | Redox-regulatory protein PAMM                                            | 8  | 1.54 | 0.33 | 0.93 | 0.25 | 0.60 | 0.026  |
| <b>P56574</b> | Isocitrate dehydrogenase [NADP], mitochondrial                           | 27 | 1.10 | 0.24 | 0.67 | 0.18 | 0.61 | 0.037  |
| <b>P49432</b> | Pyruvate dehydrogenase E1 component subunit beta, mitochondrial          | 16 | 1.20 | 0.30 | 0.73 | 0.20 | 0.61 | 0.034  |
| <b>Q6I7R3</b> | Isochorismatase domain-containing protein 1                              | 10 | 1.44 | 0.23 | 0.87 | 0.12 | 0.61 | 0.005  |
| <b>P08503</b> | Medium-chain specific acyl-CoA dehydrogenase, mitochondrial              | 26 | 1.49 | 0.32 | 0.91 | 0.22 | 0.61 | 0.017  |
| <b>P30904</b> | Macrophage migration inhibitory factor                                   | 22 | 1.31 | 0.21 | 0.80 | 0.19 | 0.61 | 0.018  |
| <b>P41034</b> | Alpha-tocopherol transfer protein                                        | 16 | 1.28 | 0.15 | 0.78 | 0.03 | 0.61 | <0.001 |
| <b>Q562C9</b> | 1,2-dihydroxy-3-keto-5-methylthiopentene dioxygenase                     | 8  | 1.34 | 0.34 | 0.82 | 0.16 | 0.61 | 0.025  |
| <b>P31044</b> | Phosphatidylethanolamine-binding protein 1                               | 22 | 1.26 | 0.27 | 0.78 | 0.15 | 0.62 | 0.018  |
| <b>P07153</b> | Dolichyl-diphosphooligosaccharide--protein glycosyltransferase subunit 1 | 56 | 1.08 | 0.27 | 0.67 | 0.21 | 0.62 | 0.049  |
| <b>P05369</b> | Farnesyl pyrophosphate synthase                                          | 27 | 1.50 | 0.39 | 0.93 | 0.14 | 0.62 | 0.024  |
| <b>P35738</b> | 2-oxoisovalerate dehydrogenase subunit beta, mitochondrial               | 13 | 1.23 | 0.12 | 0.76 | 0.23 | 0.62 | 0.016  |
| <b>Q5M875</b> | 17-beta-hydroxysteroid dehydrogenase 13                                  | 22 | 1.09 | 0.17 | 0.68 | 0.10 | 0.62 | 0.005  |
| <b>P50137</b> | Transketolase                                                            | 80 | 1.15 | 0.20 | 0.72 | 0.16 | 0.62 | 0.016  |
| <b>P11951</b> | Cytochrome c oxidase subunit 6C-2                                        | 4  | 1.03 | 0.20 | 0.64 | 0.26 | 0.63 | 0.050  |
| <b>Q920P0</b> | L-xylulose reductase                                                     | 12 | 1.44 | 0.45 | 0.91 | 0.05 | 0.63 | 0.028  |
| <b>P20070</b> | NADH-cytochrome b5 reductase 3                                           | 26 | 1.62 | 0.42 | 1.02 | 0.32 | 0.63 | 0.043  |
| <b>P51650</b> | Succinate-semialdehyde dehydrogenase, mitochondrial                      | 10 | 1.21 | 0.32 | 0.76 | 0.06 | 0.63 | 0.019  |
| <b>Q63276</b> | Bile acid-CoA:amino acid N-acyltransferase                               | 57 | 1.25 | 0.27 | 0.79 | 0.20 | 0.63 | 0.026  |
| <b>Q5PQT3</b> | Glycine N-acyltransferase                                                | 22 | 1.05 | 0.24 | 0.67 | 0.06 | 0.64 | 0.016  |
| <b>Q9QYU4</b> | Thiomorpholine-carboxylate dehydrogenase                                 | 9  | 1.31 | 0.25 | 0.84 | 0.17 | 0.64 | 0.017  |
| <b>P25235</b> | Dolichyl-diphosphooligosaccharide--protein glycosyltransferase subunit 2 | 46 | 1.18 | 0.28 | 0.76 | 0.15 | 0.64 | 0.028  |

|               |                                                                         |     |      |      |      |      |      |       |
|---------------|-------------------------------------------------------------------------|-----|------|------|------|------|------|-------|
| <b>P85971</b> | 6-phosphogluconolactonase                                               | 12  | 1.56 | 0.23 | 1.02 | 0.10 | 0.65 | 0.003 |
| <b>P97562</b> | Peroxisomal acyl-coenzyme<br>A oxidase 2                                | 38  | 1.45 | 0.15 | 0.94 | 0.22 | 0.65 | 0.021 |
| <b>P29266</b> | 3-hydroxyisobutyrate<br>dehydrogenase,<br>mitochondrial                 | 23  | 1.21 | 0.17 | 0.79 | 0.15 | 0.65 | 0.010 |
| <b>Q1HCL7</b> | NAD kinase domain-<br>containing protein 1                              | 17  | 1.25 | 0.18 | 0.82 | 0.05 | 0.66 | 0.002 |
| <b>Q923K9</b> | APOBEC1 complementation<br>factor                                       | 10  | 1.09 | 0.26 | 0.72 | 0.16 | 0.66 | 0.040 |
| <b>P18297</b> | Sepiapterin reductase                                                   | 11  | 1.36 | 0.27 | 0.90 | 0.17 | 0.66 | 0.017 |
| <b>P32089</b> | Tricarboxylate transport<br>protein, mitochondrial                      | 11  | 1.11 | 0.09 | 0.74 | 0.17 | 0.67 | 0.015 |
| <b>Q6P7R8</b> | Estradiol 17-beta-<br>dehydrogenase 12                                  | 6   | 1.15 | 0.20 | 0.77 | 0.10 | 0.67 | 0.013 |
| <b>P07633</b> | Propionyl-CoA carboxylase<br>beta chain, mitochondrial                  | 23  | 1.21 | 0.18 | 0.81 | 0.17 | 0.67 | 0.017 |
| <b>P85973</b> | Purine nucleoside<br>phosphorylase                                      | 41  | 1.12 | 0.20 | 0.75 | 0.12 | 0.67 | 0.016 |
| <b>P15999</b> | ATP synthase subunit alpha,<br>mitochondrial                            | 122 | 1.05 | 0.08 | 0.71 | 0.16 | 0.68 | 0.012 |
| <b>O88767</b> | Protein DJ-1                                                            | 16  | 1.21 | 0.20 | 0.82 | 0.16 | 0.68 | 0.025 |
| <b>P14942</b> | Glutathione S-transferase<br>alpha-4                                    | 12  | 0.99 | 0.12 | 0.67 | 0.12 | 0.68 | 0.008 |
| <b>Q9JM53</b> | Apoptosis-inducing factor 1,<br>mitochondrial                           | 27  | 1.24 | 0.13 | 0.85 | 0.20 | 0.69 | 0.026 |
| <b>P07872</b> | Peroxisomal acyl-coenzyme<br>A oxidase 1                                | 42  | 1.33 | 0.25 | 0.92 | 0.17 | 0.70 | 0.046 |
| <b>Q923M1</b> | Mitochondrial peptide<br>methionine sulfoxide<br>reductase              | 3   | 1.19 | 0.24 | 0.84 | 0.12 | 0.70 | 0.024 |
| <b>Q6AYQ8</b> | Acylpyruvase FAHD1,<br>mitochondrial                                    | 10  | 1.15 | 0.22 | 0.81 | 0.11 | 0.71 | 0.039 |
| <b>Q6P7Q4</b> | Lactoylglutathione lyase                                                | 8   | 1.19 | 0.21 | 0.85 | 0.16 | 0.71 | 0.046 |
| <b>Q5XIH7</b> | Prohibitin-2                                                            | 29  | 1.66 | 0.28 | 1.21 | 0.24 | 0.73 | 0.046 |
| <b>P52873</b> | Pyruvate carboxylase,<br>mitochondrial                                  | 134 | 1.16 | 0.13 | 0.86 | 0.14 | 0.74 | 0.018 |
| <b>Q5M7T9</b> | Threonine synthase-like 2                                               | 6   | 1.26 | 0.23 | 0.94 | 0.11 | 0.74 | 0.037 |
| <b>P12336</b> | Solute carrier family 2,<br>facilitated glucose<br>transporter member 2 | 5   | 1.16 | 0.21 | 0.86 | 0.09 | 0.74 | 0.038 |
| <b>P46462</b> | Transitional endoplasmic<br>reticulum ATPase                            | 71  | 1.14 | 0.18 | 0.85 | 0.11 | 0.75 | 0.034 |
| <b>Q64380</b> | Sarcosine dehydrogenase,<br>mitochondrial                               | 41  | 1.28 | 0.19 | 0.96 | 0.15 | 0.75 | 0.047 |
| <b>Q8CG45</b> | Aflatoxin B1 aldehyde<br>reductase member 2                             | 22  | 1.11 | 0.05 | 0.84 | 0.07 | 0.75 | 0.001 |
| <b>P97700</b> | Mitochondrial 2-<br>oxoglutarate/malate carrier<br>protein              | 7   | 1.15 | 0.19 | 0.87 | 0.05 | 0.75 | 0.016 |
| <b>Q68FT1</b> | Ubiquinone biosynthesis<br>protein COQ9, mitochondrial                  | 9   | 1.01 | 0.06 | 0.77 | 0.08 | 0.76 | 0.004 |
| <b>Q7TMA5</b> | Apolipoprotein B-100                                                    | 29  | 1.09 | 0.21 | 0.83 | 0.08 | 0.76 | 0.047 |
| <b>P97519</b> | Hydroxymethylglutaryl-CoA<br>lyase, mitochondrial                       | 14  | 0.99 | 0.09 | 0.77 | 0.14 | 0.78 | 0.036 |

|                                  |                                                                               |    |      |      |      |      |       |        |
|----------------------------------|-------------------------------------------------------------------------------|----|------|------|------|------|-------|--------|
| <b>Q641Y0</b>                    | Dolichyl-diphosphooligosaccharide--protein glycosyltransferase 48 kDa subunit | 16 | 1.18 | 0.12 | 0.92 | 0.13 | 0.78  | 0.032  |
| <b>P80067</b>                    | Dipeptidyl peptidase 1                                                        | 12 | 1.09 | 0.19 | 0.86 | 0.04 | 0.79  | 0.039  |
| <b>Q9JLA3</b>                    | UDP-glucose:glycoprotein glucosyltransferase 1                                | 28 | 0.97 | 0.06 | 0.78 | 0.06 | 0.80  | 0.003  |
| <b>P26453</b>                    | Basigin                                                                       | 7  | 1.15 | 0.14 | 0.96 | 0.00 | 0.84  | 0.028  |
| <b>Q05096</b>                    | Myosin-Ib                                                                     | 94 | 1.03 | 0.04 | 0.87 | 0.08 | 0.84  | 0.013  |
| <b>P84903</b>                    | Stromal interaction molecule 1                                                | 5  | 1.03 | 0.03 | 0.91 | 0.09 | 0.88  | 0.047  |
| <b>Proteins increased at 48h</b> |                                                                               |    |      |      |      |      |       |        |
| <b>P42930</b>                    | Heat shock protein beta-1                                                     | 10 | 0.12 | 0.11 | 2.87 | 1.41 | 23.49 | <0.001 |
| <b>Q07439</b>                    | Heat shock 70 kDa protein 1A/1B                                               | 56 | 0.21 | 0.20 | 2.77 | 1.50 | 13.39 | 0.002  |
| <b>P38918</b>                    | Aflatoxin B1 aldehyde reductase member 3                                      | 42 | 0.20 | 0.17 | 1.55 | 0.68 | 7.60  | 0.003  |
| <b>P01048</b>                    | T-kininogen 1                                                                 | 15 | 0.25 | 0.21 | 1.83 | 0.91 | 7.21  | 0.010  |
| <b>P02764</b>                    | Alpha-1-acid glycoprotein                                                     | 6  | 0.31 | 0.37 | 1.83 | 0.22 | 5.87  | 0.017  |
| <b>P06866</b>                    | Haptoglobin                                                                   | 21 | 0.33 | 0.15 | 1.74 | 0.81 | 5.26  | 0.003  |
| <b>P82995</b>                    | Heat shock protein HSP 90-alpha                                               | 74 | 0.47 | 0.29 | 2.00 | 0.82 | 4.25  | 0.006  |
| <b>P05370</b>                    | Glucose-6-phosphate 1-dehydrogenase                                           | 15 | 0.38 | 0.22 | 1.63 | 0.36 | 4.24  | 0.004  |
| <b>O70199</b>                    | UDP-glucose 6-dehydrogenase                                                   | 38 | 0.32 | 0.10 | 1.28 | 0.34 | 4.04  | 0.001  |
| <b>Q66HA8</b>                    | Heat shock protein 105 kDa                                                    | 23 | 0.47 | 0.24 | 1.72 | 0.21 | 3.64  | 0.004  |
| <b>P02680</b>                    | Fibrinogen gamma chain                                                        | 17 | 0.54 | 0.24 | 1.86 | 0.65 | 3.43  | 0.008  |
| <b>P20059</b>                    | Hemopexin                                                                     | 24 | 0.45 | 0.12 | 1.53 | 0.73 | 3.37  | 0.005  |
| <b>P06762</b>                    | Heme oxygenase 1                                                              | 5  | 0.57 | 0.28 | 1.82 | 0.76 | 3.21  | 0.027  |
| <b>P06399</b>                    | Fibrinogen alpha chain                                                        | 39 | 0.50 | 0.29 | 1.58 | 0.31 | 3.18  | 0.019  |
| <b>P09006</b>                    | Serine protease inhibitor A3N                                                 | 19 | 0.61 | 0.19 | 1.82 | 0.67 | 3.00  | 0.003  |
| <b>P04961</b>                    | Proliferating cell nuclear antigen                                            | 4  | 0.41 | 0.07 | 1.21 | 0.37 | 2.97  | 0.001  |
| <b>O89049</b>                    | Thioredoxin reductase 1, cytoplasmic                                          | 17 | 0.42 | 0.29 | 1.19 | 0.36 | 2.87  | 0.031  |
| <b>P13383</b>                    | Nucleolin                                                                     | 21 | 0.47 | 0.15 | 1.33 | 0.13 | 2.87  | <0.001 |
| <b>P11980</b>                    | Pyruvate kinase isozymes M1/M2                                                | 19 | 0.44 | 0.09 | 1.23 | 0.38 | 2.81  | 0.002  |
| <b>P17475</b>                    | Alpha-1-antiproteinase                                                        | 39 | 0.47 | 0.18 | 1.31 | 0.57 | 2.77  | 0.012  |
| <b>P62982</b>                    | Ubiquitin-40S ribosomal protein S27a                                          | 23 | 0.50 | 0.30 | 1.38 | 0.33 | 2.73  | 0.018  |
| <b>P05982</b>                    | NAD(P)H dehydrogenase [quinone] 1                                             | 8  | 0.50 | 0.12 | 1.37 | 0.37 | 2.73  | 0.002  |
| <b>P07150</b>                    | Annexin A1                                                                    | 12 | 0.55 | 0.23 | 1.47 | 0.49 | 2.70  | 0.015  |
| <b>P05371</b>                    | Clusterin                                                                     | 6  | 0.56 | 0.31 | 1.52 | 0.52 | 2.70  | 0.041  |
| <b>P04906</b>                    | Glutathione S-transferase P                                                   | 12 | 0.26 | 0.22 | 0.70 | 0.41 | 2.69  | 0.045  |
| <b>O35821</b>                    | Myb-binding protein 1A                                                        | 15 | 0.53 | 0.17 | 1.40 | 0.25 | 2.63  | 0.002  |
| <b>P14480</b>                    | Fibrinogen beta chain                                                         | 25 | 0.52 | 0.24 | 1.36 | 0.55 | 2.63  | 0.026  |

|               |                                                            |     |      |      |      |      |      |        |
|---------------|------------------------------------------------------------|-----|------|------|------|------|------|--------|
| <b>Q3B8Q1</b> | Nucleolar RNA helicase 2                                   | 7   | 0.48 | 0.20 | 1.26 | 0.26 | 2.62 | 0.005  |
| <b>P13084</b> | Nucleophosmin                                              | 14  | 0.51 | 0.21 | 1.29 | 0.17 | 2.53 | 0.011  |
| <b>P63018</b> | Heat shock cognate 71 kDa protein                          | 106 | 0.60 | 0.12 | 1.51 | 0.35 | 2.50 | 0.001  |
| <b>P06761</b> | 78 kDa glucose-regulated protein                           | 112 | 0.69 | 0.25 | 1.70 | 0.50 | 2.47 | 0.008  |
| <b>P52631</b> | Signal transducer and activator of transcription 3         | 10  | 0.64 | 0.30 | 1.57 | 0.46 | 2.45 | 0.011  |
| <b>P08430</b> | UDP-glucuronosyltransferase 1-6                            | 40  | 0.58 | 0.23 | 1.37 | 0.48 | 2.34 | 0.017  |
| <b>D4A4T9</b> | Cysteine and histidine-rich domain-containing protein 1    | 3   | 0.86 | 0.23 | 2.00 | 1.03 | 2.32 | 0.046  |
| <b>Q62812</b> | Myosin-9                                                   | 161 | 0.57 | 0.26 | 1.31 | 0.35 | 2.30 | 0.018  |
| <b>P63029</b> | Translationally-controlled tumor protein                   | 9   | 0.69 | 0.20 | 1.52 | 0.27 | 2.20 | 0.004  |
| <b>P05765</b> | 40S ribosomal protein S21                                  | 10  | 0.55 | 0.32 | 1.21 | 0.25 | 2.20 | 0.032  |
| <b>P62961</b> | Nuclease-sensitive element-binding protein 1               | 22  | 0.71 | 0.33 | 1.55 | 0.19 | 2.17 | 0.025  |
| <b>P05197</b> | Elongation factor 2                                        | 70  | 0.71 | 0.15 | 1.55 | 0.27 | 2.17 | 0.001  |
| <b>O35814</b> | Stress-induced-phosphoprotein 1                            | 24  | 0.72 | 0.16 | 1.54 | 0.71 | 2.15 | 0.031  |
| <b>P34058</b> | Heat shock protein HSP 90-beta                             | 80  | 0.77 | 0.18 | 1.65 | 0.41 | 2.14 | 0.005  |
| <b>B0BNA5</b> | Coactosin-like protein                                     | 3   | 0.60 | 0.19 | 1.27 | 0.44 | 2.11 | 0.022  |
| <b>Q63525</b> | Nuclear migration protein nudC                             | 9   | 0.51 | 0.16 | 1.05 | 0.42 | 2.05 | 0.035  |
| <b>P31000</b> | Vimentin                                                   | 32  | 0.51 | 0.15 | 1.03 | 0.26 | 2.04 | 0.012  |
| <b>Q62651</b> | Delta(3,5)-Delta(2,4)-dienoyl-CoA isomerase, mitochondrial | 17  | 0.62 | 0.20 | 1.26 | 0.50 | 2.03 | 0.026  |
| <b>O35763</b> | Moesin                                                     | 19  | 0.58 | 0.12 | 1.18 | 0.14 | 2.03 | 0.001  |
| <b>Q6AYC2</b> | Immunity-related GTPase family M protein                   | 3   | 0.71 | 0.25 | 1.43 | 0.29 | 2.02 | 0.017  |
| <b>P50503</b> | Hsc70-interacting protein                                  | 14  | 0.69 | 0.32 | 1.39 | 0.50 | 2.02 | 0.047  |
| <b>P13221</b> | Aspartate aminotransferase, cytoplasmic                    | 30  | 0.51 | 0.20 | 1.01 | 0.37 | 1.99 | 0.043  |
| <b>Q9JJ19</b> | Na(+)/H(+) exchange regulatory cofactor NHE-RF1            | 13  | 0.70 | 0.17 | 1.37 | 0.43 | 1.95 | 0.021  |
| <b>Q6URK4</b> | Heterogeneous nuclear ribonucleoprotein A3                 | 20  | 0.56 | 0.07 | 1.08 | 0.26 | 1.91 | 0.004  |
| <b>Q1JU68</b> | Eukaryotic translation initiation factor 3 subunit A       | 23  | 0.66 | 0.17 | 1.26 | 0.26 | 1.91 | 0.007  |
| <b>Q07936</b> | Annexin A2                                                 | 15  | 0.61 | 0.20 | 1.13 | 0.38 | 1.87 | 0.036  |
| <b>P26772</b> | 10 kDa heat shock protein, mitochondrial                   | 13  | 0.72 | 0.29 | 1.34 | 0.12 | 1.87 | 0.016  |
| <b>Q9Z2G8</b> | Nucleosome assembly protein 1-like 1                       | 5   | 0.72 | 0.14 | 1.35 | 0.24 | 1.87 | 0.005  |
| <b>Q5M9G3</b> | Caprin-1                                                   | 4   | 0.88 | 0.24 | 1.65 | 0.58 | 1.87 | 0.035  |
| <b>P45592</b> | Cofilin-1                                                  | 14  | 0.65 | 0.06 | 1.21 | 0.16 | 1.86 | <0.001 |
| <b>P70619</b> | Glutathione reductase (Fragment)                           | 8   | 0.68 | 0.17 | 1.25 | 0.29 | 1.85 | 0.014  |
| <b>O35987</b> | NSFL1 cofactor p47                                         | 14  | 0.71 | 0.37 | 1.29 | 0.21 | 1.82 | 0.036  |
| <b>Q5BJY9</b> | Keratin, type I cytoskeletal 18                            | 82  | 0.77 | 0.29 | 1.35 | 0.23 | 1.76 | 0.040  |

|               |                                                          |     |      |      |      |      |      |       |
|---------------|----------------------------------------------------------|-----|------|------|------|------|------|-------|
| <b>P69897</b> | Tubulin beta-5 chain<br>Hypoxia up-regulated             | 75  | 0.53 | 0.17 | 0.92 | 0.20 | 1.75 | 0.027 |
| <b>Q63617</b> | protein 1                                                | 55  | 0.66 | 0.13 | 1.16 | 0.17 | 1.74 | 0.005 |
| <b>O88600</b> | Heat shock 70 kDa protein 4<br>Nucleolar and coiled-body | 28  | 0.73 | 0.13 | 1.26 | 0.11 | 1.72 | 0.001 |
| <b>P41777</b> | phosphoprotein 1                                         | 4   | 0.65 | 0.19 | 1.11 | 0.13 | 1.71 | 0.023 |
| <b>P13635</b> | Ceruloplasmin                                            | 19  | 0.67 | 0.20 | 1.14 | 0.22 | 1.70 | 0.028 |
| <b>P11442</b> | Clathrin heavy chain 1                                   | 103 | 0.77 | 0.10 | 1.28 | 0.15 | 1.67 | 0.001 |
| <b>P30009</b> | Myristoylated alanine-rich C-<br>kinase substrate        | 12  | 0.50 | 0.17 | 0.84 | 0.10 | 1.67 | 0.032 |
| <b>Q8K1Q0</b> | Glycylpeptide N-<br>tetradecanoyltransferase 1           | 5   | 0.87 | 0.15 | 1.45 | 0.34 | 1.66 | 0.016 |
| <b>P62425</b> | 60S ribosomal protein L7a<br>Stress-70 protein,          | 13  | 0.70 | 0.20 | 1.16 | 0.15 | 1.65 | 0.012 |
| <b>P48721</b> | mitochondrial                                            | 67  | 0.75 | 0.14 | 1.23 | 0.25 | 1.64 | 0.015 |
| <b>P63102</b> | 14-3-3 protein zeta/delta                                | 26  | 0.63 | 0.11 | 1.03 | 0.17 | 1.63 | 0.006 |
| <b>Q68FR6</b> | Elongation factor 1-gamma                                | 21  | 0.73 | 0.08 | 1.19 | 0.20 | 1.63 | 0.002 |
| <b>P20673</b> | Argininosuccinate lyase                                  | 42  | 0.69 | 0.14 | 1.13 | 0.27 | 1.62 | 0.035 |
| <b>P04276</b> | Vitamin D-binding protein<br>60 kDa heat shock protein,  | 15  | 0.78 | 0.14 | 1.24 | 0.33 | 1.60 | 0.031 |
| <b>P63039</b> | mitochondrial<br>Polyadenylate-binding                   | 161 | 0.87 | 0.30 | 1.39 | 0.34 | 1.60 | 0.049 |
| <b>Q9EPH8</b> | protein 1                                                | 24  | 0.82 | 0.14 | 1.30 | 0.36 | 1.59 | 0.038 |
| <b>P08082</b> | Clathrin light chain B                                   | 3   | 0.67 | 0.13 | 1.07 | 0.10 | 1.59 | 0.005 |
| <b>P11232</b> | Thioredoxin                                              | 7   | 0.69 | 0.12 | 1.10 | 0.30 | 1.58 | 0.032 |
| <b>P19945</b> | 60S acidic ribosomal protein<br>P0                       | 24  | 0.68 | 0.12 | 1.08 | 0.14 | 1.58 | 0.007 |
| <b>P62634</b> | Cellular nucleic acid-binding<br>protein                 | 5   | 0.71 | 0.18 | 1.11 | 0.08 | 1.56 | 0.012 |
| <b>P28064</b> | Proteasome subunit beta<br>type-8                        | 6   | 0.76 | 0.16 | 1.18 | 0.22 | 1.56 | 0.019 |
| <b>P02401</b> | 60S acidic ribosomal protein<br>P2                       | 31  | 0.71 | 0.09 | 1.11 | 0.16 | 1.56 | 0.004 |
| <b>B5DFC8</b> | Eukaryotic translation<br>initiation factor 3 subunit C  | 14  | 0.85 | 0.12 | 1.31 | 0.10 | 1.55 | 0.002 |
| <b>Q5RKI1</b> | Eukaryotic initiation factor<br>4A-II                    | 22  | 0.84 | 0.12 | 1.31 | 0.11 | 1.55 | 0.002 |
| <b>P81795</b> | Eukaryotic translation<br>initiation factor 2 subunit 3  | 11  | 0.77 | 0.09 | 1.19 | 0.31 | 1.54 | 0.021 |
| <b>O08629</b> | Transcription intermediary<br>factor 1-beta              | 8   | 0.82 | 0.21 | 1.24 | 0.22 | 1.51 | 0.036 |
| <b>Q62667</b> | Major vault protein                                      | 19  | 0.77 | 0.08 | 1.13 | 0.16 | 1.47 | 0.007 |
| <b>P38656</b> | Lupus La protein homolog<br>GMP synthase [glutamine-     | 7   | 0.83 | 0.16 | 1.21 | 0.16 | 1.47 | 0.017 |
| <b>Q4V7C6</b> | hydrolyzing]<br>Proteasome inhibitor PI31                | 7   | 0.78 | 0.19 | 1.15 | 0.13 | 1.47 | 0.025 |
| <b>Q5XIU5</b> | subunit                                                  | 2   | 0.85 | 0.20 | 1.25 | 0.18 | 1.46 | 0.027 |
| <b>P62250</b> | 40S ribosomal protein S16                                | 13  | 0.83 | 0.17 | 1.22 | 0.18 | 1.46 | 0.022 |
| <b>Q08163</b> | Adenylyl cyclase-associated<br>protein 1                 | 9   | 0.85 | 0.23 | 1.23 | 0.20 | 1.45 | 0.044 |
| <b>P04256</b> | Heterogeneous nuclear<br>ribonucleoprotein A1            | 18  | 0.86 | 0.02 | 1.24 | 0.26 | 1.45 | 0.012 |

|               |                                                         |    |      |      |      |      |      |       |
|---------------|---------------------------------------------------------|----|------|------|------|------|------|-------|
| <b>A0JPM9</b> | Eukaryotic translation initiation factor 3 subunit J    | 5  | 0.80 | 0.22 | 1.16 | 0.16 | 1.45 | 0.047 |
| <b>Q6AXS5</b> | Plasminogen activator inhibitor 1 RNA-binding protein   | 12 | 0.72 | 0.16 | 1.05 | 0.19 | 1.45 | 0.036 |
| <b>Q6P799</b> | Seryl-tRNA synthetase, cytoplasmic                      | 14 | 0.84 | 0.15 | 1.21 | 0.26 | 1.45 | 0.045 |
| <b>Q07205</b> | Eukaryotic translation initiation factor 5              | 10 | 0.80 | 0.11 | 1.13 | 0.18 | 1.40 | 0.023 |
| <b>P62815</b> | V-type proton ATPase subunit B, brain isoform           | 14 | 0.82 | 0.20 | 1.14 | 0.15 | 1.39 | 0.042 |
| <b>Q9EQS0</b> | Transaldolase                                           | 15 | 0.73 | 0.09 | 0.99 | 0.13 | 1.37 | 0.012 |
| <b>P63086</b> | Mitogen-activated protein kinase 1                      | 5  | 0.83 | 0.08 | 1.12 | 0.14 | 1.36 | 0.009 |
| <b>P38650</b> | Cytoplasmic dynein 1 heavy chain 1                      | 51 | 0.76 | 0.07 | 1.03 | 0.14 | 1.36 | 0.011 |
| <b>Q63347</b> | 26S protease regulatory subunit 7                       | 15 | 0.88 | 0.06 | 1.19 | 0.18 | 1.35 | 0.013 |
| <b>P62859</b> | 40S ribosomal protein S28                               | 7  | 0.79 | 0.14 | 1.07 | 0.16 | 1.35 | 0.036 |
| <b>Q6P502</b> | T-complex protein 1 subunit gamma                       | 34 | 0.92 | 0.14 | 1.24 | 0.09 | 1.34 | 0.013 |
| <b>Q63945</b> | Protein SET                                             | 9  | 0.77 | 0.15 | 1.03 | 0.15 | 1.34 | 0.049 |
| <b>Q4FZY0</b> | EF-hand domain-containing protein D2                    | 4  | 0.84 | 0.13 | 1.08 | 0.15 | 1.30 | 0.043 |
| <b>Q6P7P5</b> | Basic leucine zipper and W2 domain-containing protein 1 | 7  | 0.79 | 0.14 | 1.03 | 0.09 | 1.30 | 0.041 |
| <b>P68511</b> | 14-3-3 protein eta                                      | 15 | 0.85 | 0.10 | 1.09 | 0.12 | 1.29 | 0.020 |
| <b>P12001</b> | 60S ribosomal protein L18                               | 9  | 0.83 | 0.13 | 1.07 | 0.09 | 1.29 | 0.025 |
| <b>P38659</b> | Protein disulfide-isomerase A4                          | 45 | 0.86 | 0.14 | 1.09 | 0.09 | 1.27 | 0.039 |
| <b>Q505J9</b> | ATPase family AAA domain-containing protein 1           | 2  | 0.93 | 0.08 | 1.14 | 0.16 | 1.24 | 0.044 |
| <b>P29314</b> | 40S ribosomal protein S9                                | 13 | 0.86 | 0.10 | 1.06 | 0.08 | 1.24 | 0.022 |
| <b>P18395</b> | Cold shock domain-containing protein E1                 | 3  | 0.82 | 0.11 | 1.01 | 0.01 | 1.22 | 0.026 |
| <b>Q9ER24</b> | Ataxin-10                                               | 4  | 0.91 | 0.08 | 1.10 | 0.05 | 1.21 | 0.009 |
| <b>Q6RUV5</b> | Ras-related C3 botulinum toxin substrate 1              | 4  | 0.88 | 0.11 | 1.04 | 0.03 | 1.18 | 0.042 |
| <b>Q6AXS3</b> | Protein DEK                                             | 4  | 0.93 | 0.12 | 1.09 | 0.05 | 1.18 | 0.043 |

**Supplementary Table 1C:** *i*TRAQ-based proteomic comparison of liver proteins in vehicle control- and APAP-treated rats (72h timepoint). Proteins with expression that was different (raw P < 0.05) between control and APAP-treated rats at 72h are listed. Mean expression values relative to a common pool are given for n=4 animals. Proteins are ordered according to the ratio between the 72h and control groups (lowest to highest) such that proteins with expression that was most markedly reduced at 72h appear at the top of the list.

<sup>a</sup>Average number of peptides used for quantification across the four individual iTRAQ runs.

<sup>b</sup>Uncorrected raw P value.

| Uniprot<br>Accession           | Name                                                        | Peptides <sup>a</sup> | Vehicle<br>control |      | 72h  |      | 72h/ctrl | P-value <sup>b</sup> |
|--------------------------------|-------------------------------------------------------------|-----------------------|--------------------|------|------|------|----------|----------------------|
|                                |                                                             |                       | Mean               | SD   | Mean | SD   | Ratio    |                      |
| <b>Proteins reduced at 72h</b> |                                                             |                       |                    |      |      |      |          |                      |
| P09606                         | Glutamine synthetase                                        | 17                    | 2.73               | 0.78 | 0.06 | 0.03 | 0.02     | <0.001               |
| P08683                         | Cytochrome P450 2C11                                        | 51                    | 2.53               | 0.52 | 0.16 | 0.09 | 0.06     | <0.001               |
| P49890                         | Estrogen sulfotransferase,<br>isoform 6                     | 18                    | 3.22               | 0.91 | 0.22 | 0.15 | 0.07     | <0.001               |
| P14141                         | Carbonic anhydrase 3                                        | 70                    | 1.99               | 1.30 | 0.18 | 0.20 | 0.09     | 0.007                |
| P36365                         | Dimethylaniline<br>monooxygenase [N-oxide-<br>forming] 1    | 13                    | 2.34               | 0.94 | 0.22 | 0.15 | 0.10     | 0.002                |
| P02761                         | Major urinary protein                                       | 22                    | 2.27               | 0.42 | 0.30 | 0.30 | 0.13     | 0.006                |
| Q9ES38                         | Bile acyl-CoA synthetase                                    | 26                    | 2.80               | 0.86 | 0.39 | 0.39 | 0.14     | 0.007                |
| P17988                         | Sulfotransferase 1A1                                        | 30                    | 1.99               | 0.34 | 0.28 | 0.16 | 0.14     | 0.001                |
| P00502                         | Glutathione S-transferase<br>alpha-1                        | 51                    | 1.57               | 1.21 | 0.28 | 0.27 | 0.18     | 0.015                |
| Q03336                         | Regucalcin                                                  | 45                    | 1.98               | 0.18 | 0.36 | 0.38 | 0.18     | 0.011                |
| P05183                         | Cytochrome P450 3A2                                         | 15                    | 2.49               | 0.97 | 0.46 | 0.24 | 0.18     | 0.009                |
| P16303                         | Carboxylesterase 3                                          | 33                    | 1.85               | 0.85 | 0.36 | 0.33 | 0.20     | 0.012                |
| Q64565                         | Alanine--glyoxylate<br>aminotransferase 2,<br>mitochondrial | 28                    | 1.26               | 0.46 | 0.25 | 0.14 | 0.20     | 0.002                |
| P04182                         | Ornithine aminotransferase,<br>mitochondrial                | 8                     | 1.44               | 0.74 | 0.29 | 0.13 | 0.20     | 0.007                |
| P50237                         | Sulfotransferase 1C1                                        | 27                    | 1.95               | 0.15 | 0.39 | 0.17 | 0.20     | <0.001               |
| Q64611                         | Cysteine sulfinic acid<br>decarboxylase                     | 25                    | 1.81               | 0.70 | 0.41 | 0.61 | 0.23     | 0.025                |
| Q07523                         | Hydroxyacid oxidase 2                                       | 8                     | 1.99               | 0.34 | 0.47 | 0.07 | 0.24     | <0.001               |
| P12928                         | Pyruvate kinase isozymes<br>R/L                             | 61                    | 1.64               | 0.53 | 0.40 | 0.17 | 0.24     | 0.002                |
| P14173                         | Aromatic-L-amino-acid<br>decarboxylase                      | 13                    | 1.74               | 0.94 | 0.42 | 0.39 | 0.24     | 0.019                |
| P10867                         | L-gulonolactone oxidase                                     | 18                    | 2.00               | 0.36 | 0.49 | 0.28 | 0.24     | 0.002                |
| P10860                         | Glutamate dehydrogenase 1,<br>mitochondrial                 | 118                   | 1.63               | 0.34 | 0.40 | 0.35 | 0.25     | 0.019                |
| Q64638                         | UDP-<br>glucuronosyltransferase 1-5                         | 25                    | 3.79               | 1.58 | 0.97 | 0.93 | 0.26     | 0.022                |
| P50169                         | Retinol dehydrogenase 3                                     | 30                    | 1.54               | 0.61 | 0.40 | 0.27 | 0.26     | 0.008                |



|               |                                                                              |     |      |      |      |      |      |       |
|---------------|------------------------------------------------------------------------------|-----|------|------|------|------|------|-------|
| <b>P09811</b> | Glycogen phosphorylase, liver form                                           | 76  | 1.40 | 0.26 | 0.38 | 0.15 | 0.27 | 0.002 |
| <b>P25093</b> | Fumarylacetoacetase                                                          | 48  | 1.45 | 0.12 | 0.41 | 0.29 | 0.29 | 0.012 |
| <b>Q5U2Q3</b> | Ester hydrolase C11orf54 homolog                                             | 12  | 2.00 | 0.36 | 0.58 | 0.29 | 0.29 | 0.011 |
| <b>P02692</b> | Fatty acid-binding protein, liver                                            | 69  | 1.94 | 0.49 | 0.57 | 0.18 | 0.29 | 0.002 |
| <b>Q4KLP0</b> | Probable 2-oxoglutarate dehydrogenase E1 component DHKTD1, mitochondrial     | 35  | 1.59 | 0.56 | 0.48 | 0.26 | 0.30 | 0.015 |
| <b>P55051</b> | Fatty acid-binding protein, brain                                            | 9   | 1.61 | 0.57 | 0.49 | 0.40 | 0.30 | 0.024 |
| <b>Q4KLZ6</b> | Bifunctional ATP-dependent dihydroxyacetone kinase/FAD-AMP lyase (cyclizing) | 64  | 1.70 | 0.39 | 0.52 | 0.25 | 0.31 | 0.013 |
| <b>Q497B0</b> | Omega-amidase NIT2                                                           | 34  | 1.58 | 0.09 | 0.49 | 0.24 | 0.31 | 0.003 |
| <b>P23680</b> | Serum amyloid P-component                                                    | 4   | 1.61 | 0.24 | 0.50 | 0.34 | 0.31 | 0.014 |
| <b>P55159</b> | Serum paraoxonase/arylesterase 1                                             | 17  | 1.68 | 0.55 | 0.53 | 0.36 | 0.32 | 0.025 |
| <b>P07872</b> | Peroxisomal acyl-coenzyme A oxidase 1                                        | 42  | 1.33 | 0.25 | 0.43 | 0.28 | 0.32 | 0.017 |
| <b>P23457</b> | 3-alpha-hydroxysteroid dehydrogenase                                         | 48  | 1.51 | 0.36 | 0.49 | 0.41 | 0.32 | 0.035 |
| <b>P30839</b> | Fatty aldehyde dehydrogenase                                                 | 36  | 1.74 | 0.55 | 0.56 | 0.37 | 0.32 | 0.018 |
| <b>Q9QYU4</b> | Thiomorpholine-carboxylate dehydrogenase                                     | 9   | 1.31 | 0.25 | 0.44 | 0.24 | 0.33 | 0.010 |
| <b>P16638</b> | ATP-citrate synthase                                                         | 65  | 1.93 | 0.71 | 0.65 | 0.21 | 0.34 | 0.006 |
| <b>P20070</b> | NADH-cytochrome b5 reductase 3                                               | 26  | 1.62 | 0.42 | 0.57 | 0.21 | 0.35 | 0.005 |
| <b>Q920P0</b> | L-xylulose reductase                                                         | 12  | 1.44 | 0.45 | 0.51 | 0.18 | 0.35 | 0.004 |
| <b>Q07071</b> | Glucokinase regulatory protein                                               | 27  | 1.71 | 0.64 | 0.60 | 0.35 | 0.35 | 0.029 |
| <b>P29147</b> | D-beta-hydroxybutyrate dehydrogenase, mitochondrial                          | 42  | 1.40 | 0.23 | 0.50 | 0.47 | 0.36 | 0.047 |
| <b>Q8CHM7</b> | 2-hydroxyacyl-CoA lyase 1                                                    | 28  | 1.66 | 0.35 | 0.61 | 0.40 | 0.36 | 0.021 |
| <b>P11497</b> | Acetyl-CoA carboxylase 1                                                     | 44  | 1.46 | 0.57 | 0.53 | 0.18 | 0.37 | 0.010 |
| <b>P57113</b> | Maleylacetoacetate isomerase                                                 | 36  | 1.58 | 0.34 | 0.58 | 0.42 | 0.37 | 0.033 |
| <b>B0BNE5</b> | S-formylglutathione hydrolase                                                | 23  | 1.32 | 0.33 | 0.49 | 0.16 | 0.37 | 0.003 |
| <b>Q6DGG1</b> | Alpha/beta hydrolase domain-containing protein 14B                           | 12  | 1.36 | 0.25 | 0.51 | 0.29 | 0.37 | 0.042 |
| <b>P12785</b> | Fatty acid synthase                                                          | 155 | 1.79 | 1.03 | 0.67 | 0.11 | 0.38 | 0.030 |
| <b>P12938</b> | Cytochrome P450 2D3                                                          | 46  | 1.52 | 0.33 | 0.57 | 0.11 | 0.38 | 0.001 |
| <b>Q9R063</b> | Peroxioredoxin-5, mitochondrial                                              | 21  | 1.83 | 0.94 | 0.70 | 0.23 | 0.38 | 0.032 |
| <b>A0JQP8</b> | Alkylglycerol monooxygenase                                                  | 6   | 1.64 | 0.20 | 0.63 | 0.19 | 0.38 | 0.001 |
| <b>P70712</b> | Kynureninase                                                                 | 19  | 1.41 | 0.32 | 0.54 | 0.19 | 0.38 | 0.007 |

|               |                                                                      |     |      |      |      |      |      |        |
|---------------|----------------------------------------------------------------------|-----|------|------|------|------|------|--------|
| <b>P70473</b> | Alpha-methylacyl-CoA racemase                                        | 18  | 1.07 | 0.04 | 0.41 | 0.30 | 0.39 | 0.028  |
| <b>Q68FU3</b> | Electron transfer flavoprotein subunit beta                          | 29  | 1.17 | 0.22 | 0.46 | 0.24 | 0.39 | 0.010  |
| <b>P19112</b> | Fructose-1,6-bisphosphatase 1                                        | 72  | 1.71 | 0.38 | 0.67 | 0.38 | 0.39 | 0.018  |
| <b>Q66HG4</b> | Aldose 1-epimerase                                                   | 5   | 1.37 | 0.18 | 0.54 | 0.12 | 0.39 | <0.001 |
| <b>P24329</b> | Thiosulfate sulfurtransferase                                        | 41  | 1.33 | 0.20 | 0.52 | 0.41 | 0.39 | 0.042  |
| <b>Q02253</b> | Methylmalonate-semialdehyde dehydrogenase [acylating], mitochondrial | 124 | 1.22 | 0.24 | 0.48 | 0.39 | 0.39 | 0.044  |
| <b>P00884</b> | Fructose-bisphosphate aldolase B                                     | 129 | 1.31 | 0.33 | 0.52 | 0.39 | 0.40 | 0.047  |
| <b>P29411</b> | GTP:AMP phosphotransferase, mitochondrial                            | 7   | 1.41 | 0.24 | 0.56 | 0.11 | 0.40 | 0.001  |
| <b>O35077</b> | Glycerol-3-phosphate dehydrogenase [NAD+], cytoplasmic               | 39  | 1.45 | 0.42 | 0.58 | 0.32 | 0.40 | 0.026  |
| <b>P97612</b> | Fatty-acid amide hydrolase 1                                         | 26  | 1.67 | 0.31 | 0.67 | 0.50 | 0.40 | 0.037  |
| <b>P52873</b> | Pyruvate carboxylase, mitochondrial                                  | 134 | 1.16 | 0.13 | 0.47 | 0.35 | 0.40 | 0.042  |
| <b>P22791</b> | Hydroxymethylglutaryl-CoA synthase, mitochondrial                    | 106 | 1.46 | 0.40 | 0.60 | 0.42 | 0.41 | 0.050  |
| <b>P05544</b> | Serine protease inhibitor A3L                                        | 30  | 1.22 | 0.12 | 0.50 | 0.43 | 0.41 | 0.042  |
| <b>Q02974</b> | Ketohexokinase                                                       | 25  | 1.56 | 0.28 | 0.64 | 0.31 | 0.41 | 0.010  |
| <b>P18163</b> | Long-chain-fatty-acid--CoA ligase 1                                  | 78  | 1.54 | 0.13 | 0.65 | 0.48 | 0.42 | 0.044  |
| <b>P22734</b> | Catechol O-methyltransferase                                         | 46  | 1.49 | 0.39 | 0.63 | 0.37 | 0.42 | 0.034  |
| <b>Q62730</b> | Estradiol 17-beta-dehydrogenase 2                                    | 17  | 1.72 | 0.47 | 0.74 | 0.42 | 0.43 | 0.029  |
| <b>P06214</b> | Delta-aminolevulinic acid dehydratase                                | 35  | 1.50 | 0.26 | 0.65 | 0.13 | 0.43 | 0.001  |
| <b>Q68FP2</b> | Serum paraoxonase/lactonase 3                                        | 16  | 1.43 | 0.10 | 0.62 | 0.19 | 0.43 | 0.003  |
| <b>P08503</b> | Medium-chain specific acyl-CoA dehydrogenase, mitochondrial          | 26  | 1.49 | 0.32 | 0.65 | 0.32 | 0.44 | 0.015  |
| <b>P05545</b> | Serine protease inhibitor A3K                                        | 34  | 1.50 | 0.50 | 0.66 | 0.38 | 0.44 | 0.035  |
| <b>P13803</b> | Electron transfer flavoprotein subunit alpha, mitochondrial          | 50  | 1.29 | 0.23 | 0.57 | 0.37 | 0.44 | 0.045  |
| <b>P30713</b> | Glutathione S-transferase theta-2                                    | 19  | 1.34 | 0.31 | 0.60 | 0.26 | 0.45 | 0.020  |
| <b>P46720</b> | Solute carrier organic anion transporter family member 1A1           | 4   | 1.41 | 0.30 | 0.63 | 0.23 | 0.45 | 0.008  |
| <b>P46953</b> | 3-hydroxyanthranilate 3,4-dioxygenase                                | 25  | 1.42 | 0.40 | 0.64 | 0.26 | 0.45 | 0.030  |
| <b>P08009</b> | Glutathione S-transferase Yb-3                                       | 53  | 1.10 | 0.29 | 0.50 | 0.26 | 0.45 | 0.030  |

|               |                                                        |    |      |      |      |      |      |        |
|---------------|--------------------------------------------------------|----|------|------|------|------|------|--------|
| <b>Q64232</b> | Very-long-chain enoyl-CoA reductase                    | 35 | 1.76 | 0.41 | 0.80 | 0.41 | 0.45 | 0.045  |
| <b>O88813</b> | Long-chain-fatty-acid--CoA ligase 5                    | 28 | 1.89 | 0.67 | 0.87 | 0.36 | 0.46 | 0.029  |
| <b>P10760</b> | Adenosylhomocysteinase                                 | 54 | 1.29 | 0.20 | 0.61 | 0.24 | 0.47 | 0.010  |
| <b>P41034</b> | Alpha-tocopherol transfer protein                      | 16 | 1.28 | 0.15 | 0.61 | 0.19 | 0.47 | 0.004  |
| <b>Q68G31</b> | Phenazine biosynthesis-like domain-containing protein  | 16 | 1.23 | 0.55 | 0.59 | 0.13 | 0.48 | 0.023  |
| <b>P07953</b> | 6-phosphofructo-2-kinase/fructose-2,6-bisphosphatase 1 | 13 | 1.47 | 0.11 | 0.71 | 0.17 | 0.48 | 0.001  |
| <b>Q6AYT0</b> | Quinone oxidoreductase                                 | 9  | 1.37 | 0.36 | 0.67 | 0.24 | 0.49 | 0.023  |
| <b>Q561R9</b> | Beta-lactamase-like protein 2                          | 11 | 1.20 | 0.24 | 0.59 | 0.18 | 0.49 | 0.008  |
| <b>P57093</b> | Phytanoyl-CoA dioxygenase, peroxisomal                 | 10 | 1.36 | 0.22 | 0.67 | 0.18 | 0.50 | 0.004  |
| <b>Q9Z339</b> | Glutathione S-transferase omega-1                      | 10 | 1.42 | 0.40 | 0.70 | 0.22 | 0.50 | 0.026  |
| <b>P62959</b> | Histidine triad nucleotide-binding protein 1           | 8  | 1.59 | 0.36 | 0.80 | 0.30 | 0.50 | 0.031  |
| <b>P11348</b> | Dihydropteridine reductase                             | 27 | 1.29 | 0.44 | 0.65 | 0.25 | 0.51 | 0.044  |
| <b>Q99MS0</b> | SEC14-like protein 2                                   | 16 | 1.32 | 0.14 | 0.67 | 0.11 | 0.51 | 0.001  |
| <b>Q63060</b> | Glycerol kinase                                        | 20 | 1.68 | 0.28 | 0.86 | 0.16 | 0.51 | 0.002  |
| <b>P85971</b> | 6-phosphogluconolactonase                              | 12 | 1.56 | 0.23 | 0.80 | 0.10 | 0.51 | <0.001 |
| <b>Q63448</b> | Peroxisomal acyl-coenzyme A oxidase 3                  | 27 | 1.27 | 0.23 | 0.65 | 0.26 | 0.51 | 0.027  |
| <b>Q68FS4</b> | Cytosol aminopeptidase                                 | 53 | 1.52 | 0.14 | 0.78 | 0.30 | 0.51 | 0.031  |
| <b>P16970</b> | ATP-binding cassette sub-family D member 3             | 13 | 1.69 | 0.46 | 0.87 | 0.35 | 0.52 | 0.032  |
| <b>P45380</b> | Sulfate anion transporter 1                            | 3  | 1.09 | 0.35 | 0.57 | 0.21 | 0.52 | 0.029  |
| <b>Q9Z0V5</b> | Peroxiredoxin-4                                        | 16 | 1.03 | 0.11 | 0.55 | 0.19 | 0.53 | 0.016  |
| <b>P52847</b> | Sulfotransferase family cytosolic 1B member 1          | 16 | 1.97 | 0.42 | 1.04 | 0.26 | 0.53 | 0.007  |
| <b>Q66H45</b> | Tetratricopeptide repeat protein 36                    | 5  | 1.20 | 0.34 | 0.65 | 0.13 | 0.54 | 0.014  |
| <b>P43278</b> | Histone H1.0                                           | 4  | 1.51 | 0.31 | 0.82 | 0.26 | 0.54 | 0.021  |
| <b>Q8CG45</b> | Aflatoxin B1 aldehyde reductase member 2               | 22 | 1.11 | 0.05 | 0.60 | 0.27 | 0.54 | 0.042  |
| <b>Q6AXX6</b> | Redox-regulatory protein PAMM                          | 8  | 1.54 | 0.33 | 0.84 | 0.13 | 0.55 | 0.005  |
| <b>P30904</b> | Macrophage migration inhibitory factor                 | 22 | 1.31 | 0.21 | 0.73 | 0.30 | 0.55 | 0.032  |
| <b>P10868</b> | Guanidinoacetate N-methyltransferase                   | 16 | 1.58 | 0.51 | 0.88 | 0.23 | 0.56 | 0.030  |
| <b>P29117</b> | Peptidyl-prolyl cis-trans isomerase F, mitochondrial   | 8  | 1.25 | 0.26 | 0.70 | 0.29 | 0.56 | 0.044  |
| <b>Q03626</b> | Murinoglobulin-1                                       | 65 | 1.26 | 0.20 | 0.70 | 0.22 | 0.56 | 0.014  |
| <b>P51650</b> | Succinate-semialdehyde dehydrogenase, mitochondrial    | 10 | 1.21 | 0.32 | 0.68 | 0.05 | 0.56 | 0.007  |
| <b>P14604</b> | Enoyl-CoA hydratase, mitochondrial                     | 35 | 1.08 | 0.04 | 0.62 | 0.23 | 0.57 | 0.030  |

|               |                                                            |    |      |      |      |      |      |       |
|---------------|------------------------------------------------------------|----|------|------|------|------|------|-------|
| <b>Q6AYT9</b> | Acyl-coenzyme A synthetase ACSM5, mitochondrial            | 14 | 1.53 | 0.30 | 0.88 | 0.16 | 0.58 | 0.007 |
| <b>P31044</b> | Phosphatidylethanolamine-binding protein 1                 | 22 | 1.26 | 0.27 | 0.74 | 0.22 | 0.58 | 0.034 |
| <b>Q8VID1</b> | Dehydrogenase/reductase SDR family member 4                | 6  | 1.10 | 0.23 | 0.65 | 0.15 | 0.59 | 0.011 |
| <b>O89000</b> | Dihydropyrimidine dehydrogenase [NADP+]                    | 12 | 1.36 | 0.32 | 0.80 | 0.21 | 0.59 | 0.037 |
| <b>Q63150</b> | Dihydropyrimidinase                                        | 29 | 1.41 | 0.17 | 0.83 | 0.22 | 0.59 | 0.008 |
| <b>P97852</b> | Peroxisomal multifunctional enzyme type 2                  | 47 | 1.20 | 0.09 | 0.71 | 0.30 | 0.59 | 0.040 |
| <b>P29266</b> | 3-hydroxyisobutyrate dehydrogenase, mitochondrial          | 23 | 1.21 | 0.17 | 0.71 | 0.12 | 0.59 | 0.003 |
| <b>Q5BK17</b> | Iodotyrosine dehalogenase 1                                | 4  | 1.75 | 0.28 | 1.04 | 0.24 | 0.59 | 0.013 |
| <b>P35738</b> | 2-oxoisovalerate dehydrogenase subunit beta, mitochondrial | 13 | 1.23 | 0.12 | 0.73 | 0.24 | 0.60 | 0.020 |
| <b>Q6I7R3</b> | Isochorismatase domain-containing protein 1                | 10 | 1.44 | 0.23 | 0.86 | 0.15 | 0.60 | 0.007 |
| <b>P27364</b> | 3 beta-hydroxysteroid dehydrogenase type 5                 | 19 | 1.41 | 0.31 | 0.84 | 0.29 | 0.60 | 0.037 |
| <b>Q7TP48</b> | Adipocyte plasma membrane-associated protein               | 10 | 1.55 | 0.48 | 0.94 | 0.13 | 0.61 | 0.035 |
| <b>O35952</b> | Hydroxyacylglutathione hydrolase, mitochondrial            | 14 | 1.36 | 0.35 | 0.83 | 0.06 | 0.61 | 0.009 |
| <b>Q64380</b> | Sarcosine dehydrogenase, mitochondrial                     | 41 | 1.28 | 0.19 | 0.81 | 0.24 | 0.63 | 0.037 |
| <b>Q6AYQ8</b> | Acylpyruvase FAHD1, mitochondrial                          | 10 | 1.15 | 0.22 | 0.74 | 0.15 | 0.64 | 0.023 |
| <b>P46462</b> | Transitional endoplasmic reticulum ATPase                  | 71 | 1.14 | 0.18 | 0.73 | 0.23 | 0.64 | 0.041 |
| <b>P07633</b> | Propionyl-CoA carboxylase beta chain, mitochondrial        | 23 | 1.21 | 0.18 | 0.79 | 0.21 | 0.65 | 0.037 |
| <b>Q9ES21</b> | Phosphatidylinositide phosphatase SAC1                     | 9  | 1.33 | 0.25 | 0.90 | 0.16 | 0.67 | 0.030 |
| <b>Q923M1</b> | Mitochondrial peptide methionine sulfoxide reductase       | 3  | 1.19 | 0.24 | 0.81 | 0.15 | 0.68 | 0.027 |
| <b>Q505J8</b> | Phenylalanine--tRNA ligase alpha subunit                   | 31 | 0.99 | 0.10 | 0.67 | 0.12 | 0.68 | 0.007 |
| <b>B0BNG0</b> | Tetratricopeptide repeat protein 35                        | 11 | 1.31 | 0.30 | 0.89 | 0.14 | 0.68 | 0.028 |
| <b>P70552</b> | GTP cyclohydrolase 1 feedback regulatory protein           | 5  | 1.09 | 0.21 | 0.75 | 0.09 | 0.69 | 0.020 |
| <b>P16617</b> | Phosphoglycerate kinase 1                                  | 54 | 1.09 | 0.24 | 0.76 | 0.17 | 0.69 | 0.046 |
| <b>O88767</b> | Protein DJ-1                                               | 16 | 1.21 | 0.20 | 0.84 | 0.12 | 0.69 | 0.021 |
| <b>P27605</b> | Hypoxanthine-guanine phosphoribosyltransferase             | 12 | 1.35 | 0.20 | 0.96 | 0.15 | 0.72 | 0.025 |
| <b>Q64591</b> | 2,4-dienoyl-CoA reductase, mitochondrial                   | 23 | 1.02 | 0.10 | 0.75 | 0.14 | 0.73 | 0.023 |
| <b>O35331</b> | Pyridoxal kinase                                           | 13 | 1.22 | 0.21 | 0.91 | 0.13 | 0.75 | 0.045 |
| <b>P35433</b> | Amidophosphoribosyltransferase                             | 2  | 1.25 | 0.17 | 0.94 | 0.06 | 0.75 | 0.008 |

|               |                                                                               |    |      |      |      |      |      |       |
|---------------|-------------------------------------------------------------------------------|----|------|------|------|------|------|-------|
| <b>Q9R1Z0</b> | Voltage-dependent anion-selective channel protein 3                           | 8  | 1.17 | 0.16 | 0.90 | 0.11 | 0.77 | 0.027 |
| <b>P17625</b> | Glycogen [starch] synthase, liver                                             | 5  | 1.10 | 0.11 | 0.85 | 0.16 | 0.77 | 0.048 |
| <b>B2RYT9</b> | Translational activator of cytochrome c oxidase 1                             | 3  | 1.10 | 0.10 | 0.88 | 0.13 | 0.80 | 0.042 |
| <b>Q641Y0</b> | Dolichyl-diphosphooligosaccharide--protein glycosyltransferase 48 kDa subunit | 16 | 1.18 | 0.12 | 0.97 | 0.07 | 0.82 | 0.021 |
| <b>Q6AY78</b> | Solute carrier family 22 member 18                                            | 4  | 1.00 | 0.11 | 0.83 | 0.05 | 0.82 | 0.025 |
| <b>Q4G064</b> | 2-methoxy-6-polyprenyl-1,4-benzoquinol methylase, mitochondrial               | 6  | 1.07 | 0.10 | 0.89 | 0.07 | 0.83 | 0.027 |
| <b>Q8VI04</b> | Isoaspartyl peptidase/L-asparaginase                                          | 7  | 0.99 | 0.07 | 0.83 | 0.04 | 0.84 | 0.006 |
| <b>Q9Z1N4</b> | 3'(2'),5'-bisphosphate nucleotidase 1                                         | 4  | 0.94 | 0.07 | 0.83 | 0.05 | 0.88 | 0.044 |

#### Proteins increased at 72h

|               |                                               |     |      |      |      |      |      |        |
|---------------|-----------------------------------------------|-----|------|------|------|------|------|--------|
| <b>P01048</b> | T-kininogen 1                                 | 15  | 0.25 | 0.21 | 1.91 | 0.92 | 7.52 | 0.009  |
| <b>P02764</b> | Alpha-1-acid glycoprotein                     | 6   | 0.31 | 0.37 | 1.91 | 0.33 | 6.13 | 0.017  |
| <b>P42930</b> | Heat shock protein beta-1                     | 10  | 0.12 | 0.11 | 0.67 | 0.33 | 5.46 | 0.006  |
| <b>P11980</b> | Pyruvate kinase isozymes M1/M2                | 19  | 0.44 | 0.09 | 2.32 | 1.65 | 5.28 | 0.004  |
| <b>P31000</b> | Vimentin                                      | 32  | 0.51 | 0.15 | 2.40 | 1.34 | 4.74 | 0.004  |
| <b>P04961</b> | Proliferating cell nuclear antigen            | 4   | 0.41 | 0.07 | 1.88 | 1.39 | 4.62 | 0.005  |
| <b>P06866</b> | Haptoglobin                                   | 21  | 0.33 | 0.15 | 1.51 | 0.53 | 4.57 | 0.002  |
| <b>P38918</b> | Aflatoxin B1 aldehyde reductase member 3      | 42  | 0.20 | 0.17 | 0.87 | 0.66 | 4.29 | 0.042  |
| <b>Q07439</b> | Heat shock 70 kDa protein 1A/1B               | 56  | 0.21 | 0.20 | 0.81 | 0.35 | 3.93 | 0.020  |
| <b>P30009</b> | Myristoylated alanine-rich C-kinase substrate | 12  | 0.50 | 0.17 | 1.90 | 1.07 | 3.76 | 0.031  |
| <b>P69897</b> | Tubulin beta-5 chain                          | 75  | 0.53 | 0.17 | 1.83 | 0.76 | 3.48 | 0.004  |
| <b>P11762</b> | Galectin-1                                    | 4   | 0.73 | 0.12 | 2.38 | 0.75 | 3.29 | 0.001  |
| <b>P20059</b> | Hemopexin                                     | 24  | 0.45 | 0.12 | 1.47 | 0.25 | 3.26 | <0.001 |
| <b>P04906</b> | Glutathione S-transferase P                   | 12  | 0.26 | 0.22 | 0.84 | 0.56 | 3.21 | 0.034  |
| <b>P05370</b> | Glucose-6-phosphate 1-dehydrogenase           | 15  | 0.38 | 0.22 | 1.16 | 0.21 | 3.01 | 0.011  |
| <b>P07150</b> | Annexin A1                                    | 12  | 0.55 | 0.23 | 1.62 | 0.67 | 2.96 | 0.015  |
| <b>Q62812</b> | Myosin-9                                      | 161 | 0.57 | 0.26 | 1.69 | 0.72 | 2.96 | 0.017  |
| <b>Q5XFX0</b> | Transgelin-2                                  | 13  | 0.55 | 0.23 | 1.61 | 0.49 | 2.95 | 0.010  |
| <b>Q3B8Q1</b> | Nucleolar RNA helicase 2                      | 7   | 0.48 | 0.20 | 1.40 | 0.38 | 2.90 | 0.004  |
| <b>P07335</b> | Creatine kinase B-type                        | 11  | 0.64 | 0.11 | 1.83 | 0.58 | 2.86 | 0.001  |
| <b>P13383</b> | Nucleolin                                     | 21  | 0.47 | 0.15 | 1.30 | 0.42 | 2.80 | 0.004  |
| <b>P17475</b> | Alpha-1-antiproteinase                        | 39  | 0.47 | 0.18 | 1.30 | 0.36 | 2.74 | 0.005  |
| <b>P06302</b> | Prothymosin alpha                             | 6   | 0.70 | 0.47 | 1.88 | 0.95 | 2.70 | 0.038  |
| <b>B0BNA5</b> | Coactosin-like protein                        | 3   | 0.60 | 0.19 | 1.63 | 0.51 | 2.70 | 0.007  |
| <b>Q07936</b> | Annexin A2                                    | 15  | 0.61 | 0.20 | 1.62 | 0.92 | 2.68 | 0.032  |

|               |                                                        |     |      |      |      |      |      |        |
|---------------|--------------------------------------------------------|-----|------|------|------|------|------|--------|
| <b>P10960</b> | Sulfated glycoprotein 1                                | 14  | 0.60 | 0.11 | 1.62 | 0.42 | 2.68 | 0.001  |
| <b>P45592</b> | Cofilin-1                                              | 14  | 0.65 | 0.06 | 1.73 | 0.41 | 2.65 | <0.001 |
| <b>O35763</b> | Moesin                                                 | 19  | 0.58 | 0.12 | 1.51 | 0.45 | 2.61 | 0.002  |
| <b>P18437</b> | Non-histone chromosomal protein HMG-17                 | 3   | 0.51 | 0.22 | 1.31 | 0.52 | 2.58 | 0.022  |
| <b>O35821</b> | Myb-binding protein 1A                                 | 15  | 0.53 | 0.17 | 1.36 | 0.37 | 2.56 | 0.005  |
| <b>O70199</b> | UDP-glucose 6-dehydrogenase                            | 38  | 0.32 | 0.10 | 0.80 | 0.29 | 2.53 | 0.011  |
| <b>P14480</b> | Fibrinogen beta chain                                  | 25  | 0.52 | 0.24 | 1.24 | 0.41 | 2.40 | 0.033  |
| <b>Q9Z2G8</b> | Nucleosome assembly protein 1-like 1                   | 5   | 0.72 | 0.14 | 1.72 | 0.25 | 2.39 | 0.001  |
| <b>P16391</b> | RT1 class I histocompatibility antigen, AA alpha chain | 6   | 0.60 | 0.37 | 1.43 | 0.26 | 2.38 | 0.024  |
| <b>P13084</b> | Nucleophosmin                                          | 14  | 0.51 | 0.21 | 1.22 | 0.39 | 2.38 | 0.026  |
| <b>P13221</b> | Aspartate aminotransferase, cytoplasmic                | 30  | 0.51 | 0.20 | 1.12 | 0.28 | 2.22 | 0.013  |
| <b>Q6URK4</b> | Heterogeneous nuclear ribonucleoprotein A3             | 20  | 0.56 | 0.07 | 1.20 | 0.05 | 2.14 | <0.001 |
| <b>P63102</b> | 14-3-3 protein zeta/delta                              | 26  | 0.63 | 0.11 | 1.34 | 0.35 | 2.13 | 0.004  |
| <b>P52555</b> | Endoplasmic reticulum resident protein 29              | 12  | 0.95 | 0.19 | 1.99 | 0.93 | 2.09 | 0.023  |
| <b>Q62667</b> | Major vault protein                                    | 19  | 0.77 | 0.08 | 1.59 | 0.61 | 2.06 | 0.010  |
| <b>P13635</b> | Ceruloplasmin                                          | 19  | 0.67 | 0.20 | 1.36 | 0.23 | 2.03 | 0.008  |
| <b>P82995</b> | Heat shock protein HSP 90-alpha                        | 74  | 0.47 | 0.29 | 0.95 | 0.23 | 2.02 | 0.044  |
| <b>P05197</b> | Elongation factor 2                                    | 70  | 0.71 | 0.15 | 1.42 | 0.46 | 2.00 | 0.012  |
| <b>O35814</b> | Stress-induced-phosphoprotein 1                        | 24  | 0.72 | 0.16 | 1.44 | 0.63 | 2.00 | 0.025  |
| <b>P68255</b> | 14-3-3 protein theta                                   | 20  | 0.87 | 0.30 | 1.74 | 0.69 | 2.00 | 0.040  |
| <b>Q63525</b> | Nuclear migration protein nudC                         | 9   | 0.51 | 0.16 | 1.02 | 0.36 | 1.99 | 0.028  |
| <b>P24268</b> | Cathepsin D                                            | 12  | 0.86 | 0.30 | 1.71 | 0.28 | 1.97 | 0.006  |
| <b>P34064</b> | Proteasome subunit alpha type-5                        | 15  | 0.63 | 0.31 | 1.22 | 0.30 | 1.93 | 0.042  |
| <b>P50503</b> | Hsc70-interacting protein                              | 14  | 0.69 | 0.32 | 1.30 | 0.28 | 1.89 | 0.042  |
| <b>Q66HD0</b> | Endoplasmin                                            | 95  | 0.71 | 0.27 | 1.32 | 0.34 | 1.86 | 0.036  |
| <b>P29457</b> | Serpin H1                                              | 11  | 0.81 | 0.17 | 1.51 | 0.45 | 1.86 | 0.019  |
| <b>Q68FR6</b> | Elongation factor 1-gamma                              | 21  | 0.73 | 0.08 | 1.33 | 0.22 | 1.83 | 0.001  |
| <b>P63018</b> | Heat shock cognate 71 kDa protein                      | 106 | 0.60 | 0.12 | 1.10 | 0.21 | 1.82 | 0.006  |
| <b>O54753</b> | 17-beta-hydroxysteroid dehydrogenase type 6            | 12  | 0.85 | 0.33 | 1.53 | 0.31 | 1.80 | 0.024  |
| <b>Q63617</b> | Hypoxia up-regulated protein 1                         | 55  | 0.66 | 0.13 | 1.19 | 0.10 | 1.80 | 0.002  |
| <b>P04639</b> | Apolipoprotein A-I                                     | 20  | 0.82 | 0.28 | 1.46 | 0.27 | 1.77 | 0.035  |
| <b>P19945</b> | 60S acidic ribosomal protein P0                        | 24  | 0.68 | 0.12 | 1.18 | 0.36 | 1.73 | 0.026  |
| <b>Q5BJY9</b> | Keratin, type I cytoskeletal 18                        | 82  | 0.77 | 0.29 | 1.30 | 0.16 | 1.70 | 0.043  |
| <b>Q5M9G3</b> | Caprin-1                                               | 4   | 0.88 | 0.24 | 1.46 | 0.40 | 1.65 | 0.035  |
| <b>Q1JU68</b> | Eukaryotic translation initiation factor 3 subunit A   | 23  | 0.66 | 0.17 | 1.07 | 0.24 | 1.64 | 0.026  |

|               |                                                            |     |      |      |      |      |      |       |
|---------------|------------------------------------------------------------|-----|------|------|------|------|------|-------|
| <b>P38656</b> | Lupus La protein homolog                                   | 7   | 0.83 | 0.16 | 1.32 | 0.25 | 1.60 | 0.018 |
| <b>P62634</b> | Cellular nucleic acid-binding protein                      | 5   | 0.71 | 0.18 | 1.14 | 0.24 | 1.60 | 0.024 |
| <b>P62425</b> | 60S ribosomal protein L7a                                  | 13  | 0.70 | 0.20 | 1.11 | 0.13 | 1.58 | 0.015 |
| <b>P62828</b> | GTP-binding nuclear protein Ran                            | 8   | 0.80 | 0.17 | 1.26 | 0.28 | 1.57 | 0.022 |
| <b>P81795</b> | Eukaryotic translation initiation factor 2 subunit 3       | 11  | 0.77 | 0.09 | 1.21 | 0.12 | 1.57 | 0.001 |
| <b>Q62651</b> | Delta(3,5)-Delta(2,4)-dienoyl-CoA isomerase, mitochondrial | 17  | 0.62 | 0.20 | 0.97 | 0.15 | 1.56 | 0.035 |
| <b>P62250</b> | 40S ribosomal protein S16                                  | 13  | 0.83 | 0.17 | 1.29 | 0.18 | 1.56 | 0.011 |
| <b>P11442</b> | Clathrin heavy chain 1                                     | 103 | 0.77 | 0.10 | 1.20 | 0.25 | 1.56 | 0.011 |
| <b>P38650</b> | Cytoplasmic dynein 1 heavy chain 1                         | 51  | 0.76 | 0.07 | 1.18 | 0.32 | 1.56 | 0.018 |
| <b>O08557</b> | N(G),N(G)-dimethylarginine dimethylaminohydrolase 1        | 11  | 0.68 | 0.19 | 1.04 | 0.20 | 1.54 | 0.033 |
| <b>P12346</b> | Serotransferrin                                            | 78  | 0.76 | 0.13 | 1.16 | 0.31 | 1.54 | 0.049 |
| <b>P04644</b> | 40S ribosomal protein S17                                  | 17  | 0.80 | 0.26 | 1.23 | 0.19 | 1.54 | 0.041 |
| <b>Q08163</b> | Adenylyl cyclase-associated protein 1                      | 9   | 0.85 | 0.23 | 1.31 | 0.35 | 1.54 | 0.049 |
| <b>O08629</b> | Transcription intermediary factor 1-beta                   | 8   | 0.82 | 0.21 | 1.27 | 0.11 | 1.54 | 0.016 |
| <b>Q9JJ22</b> | Endoplasmic reticulum aminopeptidase 1                     | 8   | 0.93 | 0.14 | 1.39 | 0.37 | 1.49 | 0.038 |
| <b>Q9R0J8</b> | Legumain                                                   | 3   | 0.94 | 0.13 | 1.39 | 0.19 | 1.48 | 0.008 |
| <b>P69736</b> | Endothelial differentiation-related factor 1               | 2   | 0.81 | 0.20 | 1.20 | 0.18 | 1.48 | 0.040 |
| <b>Q9JI85</b> | Nucleobindin-2                                             | 17  | 1.02 | 0.17 | 1.50 | 0.32 | 1.47 | 0.029 |
| <b>P62853</b> | 40S ribosomal protein S25                                  | 9   | 0.76 | 0.12 | 1.12 | 0.19 | 1.47 | 0.014 |
| <b>Q63797</b> | Proteasome activator complex subunit 1                     | 26  | 0.81 | 0.15 | 1.19 | 0.10 | 1.47 | 0.009 |
| <b>Q9R1T1</b> | Barrier-to-autointegration factor                          | 3   | 0.90 | 0.25 | 1.32 | 0.13 | 1.47 | 0.026 |
| <b>Q4AEF8</b> | Coatomer subunit gamma-1                                   | 18  | 0.85 | 0.23 | 1.24 | 0.09 | 1.46 | 0.026 |
| <b>P62752</b> | 60S ribosomal protein L23a                                 | 8   | 0.78 | 0.12 | 1.14 | 0.17 | 1.46 | 0.014 |
| <b>P23514</b> | Coatomer subunit beta                                      | 30  | 0.88 | 0.12 | 1.27 | 0.30 | 1.45 | 0.040 |
| <b>P51583</b> | Multifunctional protein ADE2                               | 8   | 1.12 | 0.06 | 1.60 | 0.34 | 1.43 | 0.034 |
| <b>Q63945</b> | Protein SET                                                | 9   | 0.77 | 0.15 | 1.10 | 0.08 | 1.43 | 0.012 |
| <b>Q8K1Q0</b> | Glycopeptide N-tetradecanoyltransferase 1                  | 5   | 0.87 | 0.15 | 1.24 | 0.19 | 1.42 | 0.023 |
| <b>B5DFC8</b> | Eukaryotic translation initiation factor 3 subunit C       | 14  | 0.85 | 0.12 | 1.20 | 0.19 | 1.42 | 0.018 |
| <b>Q5RJR8</b> | Leucine-rich repeat-containing protein 59                  | 21  | 0.80 | 0.14 | 1.14 | 0.14 | 1.42 | 0.021 |
| <b>P43244</b> | Matrin-3                                                   | 12  | 0.91 | 0.07 | 1.28 | 0.09 | 1.41 | 0.001 |
| <b>P25113</b> | Phosphoglycerate mutase 1                                  | 20  | 0.92 | 0.10 | 1.30 | 0.25 | 1.41 | 0.024 |
| <b>P41123</b> | 60S ribosomal protein L13                                  | 16  | 0.76 | 0.10 | 1.06 | 0.13 | 1.40 | 0.011 |
| <b>Q3T1J1</b> | Eukaryotic translation initiation factor 5A-1              | 13  | 0.84 | 0.08 | 1.16 | 0.22 | 1.39 | 0.021 |
| <b>P68511</b> | 14-3-3 protein eta                                         | 15  | 0.85 | 0.10 | 1.18 | 0.25 | 1.39 | 0.036 |

|               |                                                  |    |      |      |      |      |      |        |
|---------------|--------------------------------------------------|----|------|------|------|------|------|--------|
| <b>P21531</b> | 60S ribosomal protein L3                         | 23 | 0.80 | 0.13 | 1.11 | 0.20 | 1.39 | 0.037  |
| <b>Q63584</b> | Transmembrane emp24 domain-containing protein 10 | 11 | 0.90 | 0.07 | 1.23 | 0.26 | 1.37 | 0.030  |
| <b>P63086</b> | Mitogen-activated protein kinase 1               | 5  | 0.83 | 0.08 | 1.12 | 0.12 | 1.36 | 0.006  |
| <b>Q64126</b> | EH domain-containing protein 1                   | 20 | 0.87 | 0.03 | 1.17 | 0.06 | 1.35 | <0.001 |
| <b>P02401</b> | 60S acidic ribosomal protein P2                  | 31 | 0.71 | 0.09 | 0.95 | 0.06 | 1.34 | 0.008  |
| <b>Q66H80</b> | Coatomer subunit delta                           | 13 | 0.91 | 0.15 | 1.22 | 0.16 | 1.34 | 0.030  |
| <b>P28023</b> | Dynactin subunit 1                               | 6  | 0.85 | 0.11 | 1.12 | 0.14 | 1.31 | 0.020  |
| <b>Q6RUV5</b> | Ras-related C3 botulinum toxin substrate 1       | 4  | 0.88 | 0.11 | 1.14 | 0.14 | 1.30 | 0.025  |
| <b>Q62871</b> | Cytoplasmic dynein 1 intermediate chain 2        | 6  | 0.89 | 0.15 | 1.14 | 0.13 | 1.28 | 0.048  |
| <b>Q5M7W5</b> | Microtubule-associated protein 4                 | 8  | 0.89 | 0.09 | 1.14 | 0.13 | 1.27 | 0.020  |
| <b>P85125</b> | Polymerase I and transcript release factor       | 5  | 0.85 | 0.03 | 1.07 | 0.05 | 1.26 | <0.001 |
| <b>P85972</b> | Vinculin                                         | 35 | 0.85 | 0.10 | 1.07 | 0.15 | 1.26 | 0.047  |
| <b>Q8CFN2</b> | Cell division control protein 42 homolog         | 8  | 0.93 | 0.10 | 1.14 | 0.08 | 1.23 | 0.014  |
| <b>P29314</b> | 40S ribosomal protein S9                         | 13 | 0.86 | 0.10 | 1.03 | 0.09 | 1.20 | 0.048  |
| <b>Q5U211</b> | Sorting nexin-3                                  | 5  | 0.93 | 0.08 | 1.07 | 0.08 | 1.16 | 0.040  |
| <b>Q62991</b> | Sec1 family domain-containing protein 1          | 8  | 0.98 | 0.05 | 1.14 | 0.04 | 1.16 | 0.002  |
| <b>O35142</b> | Coatomer subunit beta'                           | 9  | 0.93 | 0.05 | 1.04 | 0.04 | 1.11 | 0.020  |



**Supplementary Table 1D:** *i*TRAQ-based proteomic comparison of liver proteins in vehicle control- and APAP-treated rats (96h timepoint). Proteins with expression that was different (raw P < 0.05) between control and APAP-treated rats at 96h are listed. Mean expression values relative to a common pool are given for n=3 animals. Proteins are ordered according to the ratio between the 96h and control groups (lowest to highest) such that proteins with expression that was most markedly reduced at 96h appear at the top of the list.

<sup>a</sup>Average number of peptides used for quantification across the four individual iTRAQ runs.

<sup>b</sup>Uncorrected raw P value.

| Uniprot<br>Accession           | Name                                                     | Peptides <sup>a</sup> | Vehicle<br>control |      | 96h  |      | 96h/ctrl | P-<br>value <sup>b</sup> |
|--------------------------------|----------------------------------------------------------|-----------------------|--------------------|------|------|------|----------|--------------------------|
|                                |                                                          |                       | Mean               | SD   | Mean | SD   | Ratio    |                          |
| <b>Proteins reduced at 96h</b> |                                                          |                       |                    |      |      |      |          |                          |
| <b>P08683</b>                  | Cytochrome P450 2C11                                     | 51                    | 2.53               | 0.52 | 0.09 | 0.04 | 0.03     | <0.001                   |
| <b>P49890</b>                  | Estrogen sulfotransferase,<br>isoform 6                  | 18                    | 3.22               | 0.91 | 0.11 | 0.08 | 0.03     | <0.001                   |
| <b>P09606</b>                  | Glutamine synthetase                                     | 17                    | 2.73               | 0.78 | 0.10 | 0.03 | 0.03     | <0.001                   |
| <b>P14141</b>                  | Carbonic anhydrase 3                                     | 70                    | 1.99               | 1.30 | 0.10 | 0.08 | 0.05     | 0.004                    |
| <b>Q07523</b>                  | Hydroxyacid oxidase 2                                    | 8                     | 1.99               | 0.34 | 0.12 | 0.08 | 0.06     | <0.001                   |
| <b>P36365</b>                  | Dimethylaniline<br>monooxygenase [N-oxide-<br>forming] 1 | 13                    | 2.34               | 0.94 | 0.24 | 0.05 | 0.10     | <0.001                   |
| <b>P02761</b>                  | Major urinary protein                                    | 22                    | 2.27               | 0.42 | 0.25 | 0.08 | 0.11     | <0.001                   |
| <b>P10867</b>                  | L-gulonolactone oxidase                                  | 18                    | 2.00               | 0.36 | 0.31 | 0.12 | 0.15     | <0.001                   |
| <b>P50237</b>                  | Sulfotransferase 1C1                                     | 27                    | 1.95               | 0.15 | 0.31 | 0.12 | 0.16     | <0.001                   |
| <b>P17988</b>                  | Sulfotransferase 1A1                                     | 30                    | 1.99               | 0.34 | 0.34 | 0.15 | 0.17     | 0.001                    |
| <b>Q9ES38</b>                  | Bile acyl-CoA synthetase                                 | 26                    | 2.80               | 0.86 | 0.53 | 0.32 | 0.19     | 0.005                    |
| <b>P05183</b>                  | Cytochrome P450 3A2                                      | 15                    | 2.49               | 0.97 | 0.48 | 0.42 | 0.19     | 0.028                    |
| <b>P12785</b>                  | Fatty acid synthase                                      | 155                   | 1.79               | 1.03 | 0.36 | 0.07 | 0.20     | 0.009                    |
| <b>P04182</b>                  | Ornithine aminotransferase,<br>mitochondrial             | 8                     | 1.44               | 0.74 | 0.29 | 0.18 | 0.20     | 0.014                    |
| <b>Q62730</b>                  | Estradiol 17-beta-<br>dehydrogenase 2                    | 17                    | 1.72               | 0.47 | 0.35 | 0.11 | 0.20     | 0.001                    |
| <b>Q02769</b>                  | Squalene synthase                                        | 8                     | 1.70               | 0.55 | 0.36 | 0.14 | 0.21     | 0.005                    |
| <b>P11497</b>                  | Acetyl-CoA carboxylase 1                                 | 44                    | 1.46               | 0.57 | 0.33 | 0.07 | 0.22     | 0.003                    |
| <b>P16638</b>                  | ATP-citrate synthase                                     | 65                    | 1.93               | 0.71 | 0.45 | 0.01 | 0.23     | 0.001                    |
| <b>Q03336</b>                  | Regucalcin                                               | 45                    | 1.98               | 0.18 | 0.49 | 0.08 | 0.25     | <0.001                   |
| <b>P05369</b>                  | Farnesyl pyrophosphate<br>synthase                       | 27                    | 1.50               | 0.39 | 0.39 | 0.35 | 0.26     | 0.025                    |
| <b>P22734</b>                  | Catechol O-<br>methyltransferase                         | 46                    | 1.49               | 0.39 | 0.39 | 0.13 | 0.26     | 0.002                    |
| <b>P52847</b>                  | Sulfotransferase family<br>cytosolic 1B member 1         | 16                    | 1.97               | 0.42 | 0.53 | 0.15 | 0.27     | 0.001                    |
| <b>P17425</b>                  | Hydroxymethylglutaryl-CoA<br>synthase, cytoplasmic       | 9                     | 1.30               | 0.44 | 0.36 | 0.26 | 0.28     | 0.045                    |
| <b>P19225</b>                  | Cytochrome P450 2C70                                     | 19                    | 1.56               | 0.65 | 0.45 | 0.35 | 0.29     | 0.041                    |
| <b>P12928</b>                  | Pyruvate kinase isozymes<br>R/L                          | 61                    | 1.64               | 0.53 | 0.49 | 0.25 | 0.30     | 0.009                    |
| <b>Q63060</b>                  | Glycerol kinase                                          | 20                    | 1.68               | 0.28 | 0.53 | 0.10 | 0.31     | <0.001                   |

|               |                                                             |    |      |      |      |      |      |        |
|---------------|-------------------------------------------------------------|----|------|------|------|------|------|--------|
| <b>Q9EQ76</b> | Dimethylaniline monooxygenase [N-oxide-forming] 3           | 21 | 1.24 | 0.60 | 0.40 | 0.28 | 0.32 | 0.031  |
| <b>Q68FT5</b> | Betaine--homocysteine S-methyltransferase 2                 | 82 | 0.99 | 0.45 | 0.32 | 0.17 | 0.32 | 0.026  |
| <b>Q5PPL3</b> | Sterol-4-alpha-carboxylate 3-dehydrogenase, decarboxylating | 20 | 1.74 | 0.46 | 0.56 | 0.28 | 0.32 | 0.008  |
| <b>P07953</b> | 6-phosphofructo-2-kinase/fructose-2,6-bisphosphatase 1      | 13 | 1.47 | 0.11 | 0.49 | 0.34 | 0.33 | 0.018  |
| <b>O35760</b> | Isopentenyl-diphosphate Delta-isomerase 1                   | 4  | 1.38 | 0.41 | 0.47 | 0.11 | 0.34 | 0.006  |
| <b>P02692</b> | Fatty acid-binding protein, liver                           | 69 | 1.94 | 0.49 | 0.67 | 0.20 | 0.34 | 0.004  |
| <b>P16303</b> | Carboxylesterase 3                                          | 33 | 1.85 | 0.85 | 0.64 | 0.38 | 0.35 | 0.050  |
| <b>P18757</b> | Cystathionine gamma-lyase                                   | 37 | 1.40 | 0.63 | 0.48 | 0.19 | 0.35 | 0.026  |
| <b>Q63276</b> | Bile acid-CoA:amino acid N-acyltransferase                  | 57 | 1.25 | 0.27 | 0.45 | 0.15 | 0.36 | 0.004  |
| <b>P30839</b> | Fatty aldehyde dehydrogenase                                | 36 | 1.74 | 0.55 | 0.64 | 0.15 | 0.37 | 0.011  |
| <b>Q64611</b> | Cysteine sulfinic acid decarboxylase                        | 25 | 1.81 | 0.70 | 0.67 | 0.19 | 0.37 | 0.012  |
| <b>Q5FVR2</b> | Thymidine phosphorylase                                     | 11 | 1.80 | 0.99 | 0.69 | 0.08 | 0.38 | 0.033  |
| <b>P11030</b> | Acyl-CoA-binding protein                                    | 20 | 1.87 | 1.03 | 0.72 | 0.23 | 0.38 | 0.036  |
| <b>P20070</b> | NADH-cytochrome b5 reductase 3                              | 26 | 1.62 | 0.42 | 0.62 | 0.09 | 0.38 | 0.002  |
| <b>P06214</b> | Delta-aminolevulinic acid dehydratase                       | 35 | 1.50 | 0.26 | 0.58 | 0.07 | 0.39 | <0.001 |
| <b>Q5I0J9</b> | Putative L-aspartate dehydrogenase                          | 17 | 1.35 | 0.44 | 0.53 | 0.12 | 0.39 | 0.017  |
| <b>P18163</b> | Long-chain-fatty-acid--CoA ligase 1                         | 78 | 1.54 | 0.13 | 0.61 | 0.06 | 0.40 | <0.001 |
| <b>Q8CHM7</b> | 2-hydroxyacyl-CoA lyase 1                                   | 28 | 1.66 | 0.35 | 0.67 | 0.01 | 0.40 | 0.001  |
| <b>P08290</b> | Asialoglycoprotein receptor 2                               | 4  | 1.04 | 0.35 | 0.42 | 0.21 | 0.40 | 0.035  |
| <b>P57093</b> | Phytanoyl-CoA dioxygenase, peroxisomal                      | 10 | 1.36 | 0.22 | 0.55 | 0.23 | 0.41 | 0.012  |
| <b>P23680</b> | Serum amyloid P-component                                   | 4  | 1.61 | 0.24 | 0.68 | 0.05 | 0.43 | <0.001 |
| <b>Q5BK17</b> | Iodotyrosine dehalogenase 1                                 | 4  | 1.75 | 0.28 | 0.75 | 0.42 | 0.43 | 0.017  |
| <b>Q64654</b> | Lanosterol 14-alpha demethylase                             | 9  | 1.45 | 0.43 | 0.63 | 0.09 | 0.43 | 0.008  |
| <b>Q68FS4</b> | Cytosol aminopeptidase                                      | 53 | 1.52 | 0.14 | 0.66 | 0.12 | 0.43 | <0.001 |
| <b>Q07071</b> | Glucokinase regulatory protein                              | 27 | 1.71 | 0.64 | 0.74 | 0.35 | 0.43 | 0.037  |
| <b>P08009</b> | Glutathione S-transferase Yb-3                              | 53 | 1.10 | 0.29 | 0.48 | 0.18 | 0.44 | 0.020  |
| <b>P55051</b> | Fatty acid-binding protein, brain                           | 9  | 1.61 | 0.57 | 0.71 | 0.31 | 0.44 | 0.041  |
| <b>P85973</b> | Purine nucleoside phosphorylase                             | 41 | 1.12 | 0.20 | 0.49 | 0.17 | 0.44 | 0.009  |
| <b>P14669</b> | Annexin A3                                                  | 17 | 1.09 | 0.27 | 0.49 | 0.12 | 0.45 | 0.007  |
| <b>P25409</b> | Alanine aminotransferase 1                                  | 19 | 0.85 | 0.09 | 0.38 | 0.08 | 0.45 | 0.001  |

|               |                                                                              |     |      |      |      |      |      |        |
|---------------|------------------------------------------------------------------------------|-----|------|------|------|------|------|--------|
| <b>P27364</b> | 3 beta-hydroxysteroid dehydrogenase type 5                                   | 19  | 1.41 | 0.31 | 0.64 | 0.13 | 0.45 | 0.004  |
| <b>P10860</b> | Glutamate dehydrogenase 1, mitochondrial                                     | 118 | 1.63 | 0.34 | 0.74 | 0.34 | 0.45 | 0.037  |
| <b>P97562</b> | Peroxisomal acyl-coenzyme A oxidase 2                                        | 38  | 1.45 | 0.15 | 0.66 | 0.34 | 0.46 | 0.038  |
| <b>O88813</b> | Long-chain-fatty-acid--CoA ligase 5                                          | 28  | 1.89 | 0.67 | 0.87 | 0.04 | 0.46 | 0.015  |
| <b>P24329</b> | Thiosulfate sulfurtransferase                                                | 41  | 1.33 | 0.20 | 0.62 | 0.19 | 0.47 | 0.006  |
| <b>O89000</b> | Dihydropyrimidine dehydrogenase [NADP+]                                      | 12  | 1.36 | 0.32 | 0.64 | 0.12 | 0.47 | 0.011  |
| <b>Q920P0</b> | L-xylulose reductase                                                         | 12  | 1.44 | 0.45 | 0.69 | 0.10 | 0.48 | 0.013  |
| <b>A0JPQ8</b> | Alkylglycerol monooxygenase                                                  | 6   | 1.64 | 0.20 | 0.78 | 0.08 | 0.48 | <0.001 |
| <b>P00884</b> | Fructose-bisphosphate aldolase B                                             | 129 | 1.31 | 0.33 | 0.64 | 0.10 | 0.49 | 0.006  |
| <b>P13107</b> | Cytochrome P450 2B3                                                          | 27  | 1.48 | 0.55 | 0.72 | 0.11 | 0.49 | 0.036  |
| <b>Q6AXX6</b> | Redox-regulatory protein PAMM                                                | 8   | 1.54 | 0.33 | 0.75 | 0.24 | 0.49 | 0.015  |
| <b>Q4KLZ6</b> | Bifunctional ATP-dependent dihydroxyacetone kinase/FAD-AMP lyase (cyclizing) | 64  | 1.70 | 0.39 | 0.83 | 0.18 | 0.49 | 0.009  |
| <b>Q66H45</b> | Tetratricopeptide repeat protein 36                                          | 5   | 1.20 | 0.34 | 0.59 | 0.21 | 0.49 | 0.036  |
| <b>P12938</b> | Cytochrome P450 2D3                                                          | 46  | 1.52 | 0.33 | 0.75 | 0.12 | 0.50 | 0.006  |
| <b>P10868</b> | Guanidinoacetate N-methyltransferase                                         | 16  | 1.58 | 0.51 | 0.79 | 0.18 | 0.50 | 0.028  |
| <b>Q5I0M2</b> | Nicotinate-nucleotide pyrophosphorylase [carboxylating]                      | 11  | 1.28 | 0.42 | 0.64 | 0.13 | 0.50 | 0.035  |
| <b>Q5U2Q3</b> | Ester hydrolase C11orf54 homolog                                             | 12  | 2.00 | 0.36 | 1.01 | 0.30 | 0.51 | 0.015  |
| <b>Q63150</b> | Dihydropyrimidinase                                                          | 29  | 1.41 | 0.17 | 0.72 | 0.33 | 0.51 | 0.021  |
| <b>Q9Z339</b> | Glutathione S-transferase omega-1                                            | 10  | 1.42 | 0.40 | 0.72 | 0.28 | 0.51 | 0.048  |
| <b>Q63448</b> | Peroxisomal acyl-coenzyme A oxidase 3                                        | 27  | 1.27 | 0.23 | 0.65 | 0.09 | 0.51 | 0.003  |
| <b>Q9WUS0</b> | Adenylate kinase isoenzyme 4, mitochondrial                                  | 14  | 1.38 | 0.19 | 0.71 | 0.15 | 0.52 | 0.004  |
| <b>Q9WU49</b> | Calcium-regulated heat stable protein 1                                      | 7   | 1.17 | 0.20 | 0.61 | 0.17 | 0.52 | 0.009  |
| <b>P70712</b> | Kynureninase                                                                 | 19  | 1.41 | 0.32 | 0.74 | 0.08 | 0.52 | 0.008  |
| <b>P57113</b> | Maleylacetoacetate isomerase                                                 | 36  | 1.58 | 0.34 | 0.83 | 0.37 | 0.53 | 0.035  |
| <b>Q7TP48</b> | Adipocyte plasma membrane-associated protein                                 | 10  | 1.55 | 0.48 | 0.83 | 0.07 | 0.53 | 0.026  |
| <b>P97612</b> | Fatty-acid amide hydrolase 1                                                 | 26  | 1.67 | 0.31 | 0.90 | 0.31 | 0.54 | 0.029  |
| <b>P00173</b> | Cytochrome b5                                                                | 31  | 1.37 | 0.20 | 0.76 | 0.14 | 0.55 | 0.005  |
| <b>Q6P7R8</b> | Estradiol 17-beta-dehydrogenase 12                                           | 6   | 1.15 | 0.20 | 0.64 | 0.14 | 0.56 | 0.014  |
| <b>P55159</b> | Serum paraoxonase/arylesterase 1                                             | 17  | 1.68 | 0.55 | 0.94 | 0.06 | 0.56 | 0.037  |

|               |                                                               |     |      |      |      |      |      |       |
|---------------|---------------------------------------------------------------|-----|------|------|------|------|------|-------|
| <b>Q64232</b> | Very-long-chain enoyl-CoA reductase                           | 35  | 1.76 | 0.41 | 0.99 | 0.22 | 0.56 | 0.017 |
| <b>Q02974</b> | Ketohexokinase                                                | 25  | 1.56 | 0.28 | 0.89 | 0.20 | 0.57 | 0.015 |
| <b>Q497B0</b> | Omega-amidase NIT2                                            | 34  | 1.58 | 0.09 | 0.90 | 0.26 | 0.57 | 0.008 |
| <b>Q9QZH8</b> | Arylacetamide deacetylase                                     | 6   | 1.64 | 0.55 | 0.93 | 0.07 | 0.57 | 0.038 |
| <b>Q9QZX8</b> | Solute carrier organic anion transporter family member 1B2    | 3   | 1.36 | 0.40 | 0.78 | 0.05 | 0.57 | 0.021 |
| <b>P04937</b> | Fibronectin                                                   | 27  | 0.74 | 0.22 | 0.43 | 0.01 | 0.58 | 0.041 |
| <b>Q6AXM8</b> | Serum paraoxonase/arylesterase 2                              | 8   | 1.10 | 0.24 | 0.65 | 0.19 | 0.59 | 0.046 |
| <b>P52873</b> | Pyruvate carboxylase, mitochondrial                           | 134 | 1.16 | 0.13 | 0.68 | 0.14 | 0.59 | 0.005 |
| <b>B0BNG0</b> | Tetratricopeptide repeat protein 35                           | 11  | 1.31 | 0.30 | 0.77 | 0.15 | 0.59 | 0.022 |
| <b>P29147</b> | D-beta-hydroxybutyrate dehydrogenase, mitochondrial           | 42  | 1.40 | 0.23 | 0.83 | 0.28 | 0.59 | 0.033 |
| <b>O35331</b> | Pyridoxal kinase                                              | 13  | 1.22 | 0.21 | 0.73 | 0.20 | 0.60 | 0.032 |
| <b>P41034</b> | Alpha-tocopherol transfer protein                             | 16  | 1.28 | 0.15 | 0.77 | 0.15 | 0.60 | 0.008 |
| <b>P25093</b> | Fumarylacetoacetase                                           | 48  | 1.45 | 0.12 | 0.88 | 0.24 | 0.61 | 0.015 |
| <b>Q498D5</b> | Regulator of microtubule dynamics protein 2                   | 8   | 1.34 | 0.14 | 0.83 | 0.34 | 0.62 | 0.044 |
| <b>Q9QYU4</b> | Thiomorpholine-carboxylate dehydrogenase                      | 9   | 1.31 | 0.25 | 0.81 | 0.25 | 0.62 | 0.039 |
| <b>Q06647</b> | ATP synthase subunit O, mitochondrial                         | 35  | 1.09 | 0.27 | 0.67 | 0.08 | 0.62 | 0.043 |
| <b>P0C2X9</b> | Delta-1-pyrroline-5-carboxylate dehydrogenase, mitochondrial  | 43  | 1.30 | 0.10 | 0.81 | 0.23 | 0.62 | 0.016 |
| <b>P09456</b> | cAMP-dependent protein kinase type I-alpha regulatory subunit | 7   | 1.22 | 0.20 | 0.76 | 0.14 | 0.62 | 0.018 |
| <b>Q6DGG1</b> | Alpha/beta hydrolase domain-containing protein 14B            | 12  | 1.36 | 0.25 | 0.85 | 0.20 | 0.63 | 0.031 |
| <b>P08503</b> | Medium-chain specific acyl-CoA dehydrogenase, mitochondrial   | 26  | 1.49 | 0.32 | 0.94 | 0.13 | 0.63 | 0.024 |
| <b>P70473</b> | Alpha-methylacyl-CoA racemase                                 | 18  | 1.07 | 0.04 | 0.68 | 0.19 | 0.64 | 0.024 |
| <b>Q5M876</b> | Aspartoacylase-2                                              | 5   | 1.35 | 0.26 | 0.88 | 0.04 | 0.65 | 0.013 |
| <b>Q68FP2</b> | Serum paraoxonase/lactonase 3                                 | 16  | 1.43 | 0.10 | 0.95 | 0.13 | 0.66 | 0.003 |
| <b>Q99MS0</b> | SEC14-like protein 2                                          | 16  | 1.32 | 0.14 | 0.88 | 0.19 | 0.67 | 0.020 |
| <b>Q66HG4</b> | Aldose 1-epimerase                                            | 5   | 1.37 | 0.18 | 0.93 | 0.13 | 0.68 | 0.015 |
| <b>Q6I7R3</b> | Isochorismatase domain-containing protein 1                   | 10  | 1.44 | 0.23 | 0.97 | 0.06 | 0.68 | 0.017 |
| <b>Q63524</b> | Transmembrane emp24 domain-containing protein 2               | 8   | 1.29 | 0.21 | 0.89 | 0.09 | 0.69 | 0.018 |
| <b>P41562</b> | Isocitrate dehydrogenase [NADP] cytoplasmic                   | 59  | 1.21 | 0.08 | 0.88 | 0.15 | 0.72 | 0.014 |

|                                  |                                                            |    |      |      |      |      |       |       |
|----------------------------------|------------------------------------------------------------|----|------|------|------|------|-------|-------|
| <b>P17764</b>                    | Acetyl-CoA acetyltransferase, mitochondrial                | 60 | 1.28 | 0.07 | 0.93 | 0.15 | 0.72  | 0.009 |
| <b>Q9Z1W6</b>                    | Protein LYRIC                                              | 7  | 1.17 | 0.14 | 0.87 | 0.05 | 0.75  | 0.011 |
| <b>P27605</b>                    | Hypoxanthine-guanine phosphoribosyltransferase             | 12 | 1.35 | 0.20 | 1.01 | 0.06 | 0.75  | 0.035 |
| <b>Q64057</b>                    | Alpha-aminoadipic semialdehyde dehydrogenase               | 55 | 1.17 | 0.20 | 0.89 | 0.07 | 0.76  | 0.050 |
| <b>P60892</b>                    | Ribose-phosphate pyrophosphokinase 1                       | 6  | 1.08 | 0.15 | 0.84 | 0.04 | 0.78  | 0.035 |
| <b>P85108</b>                    | Tubulin beta-2A chain                                      | 72 | 1.11 | 0.05 | 0.88 | 0.12 | 0.79  | 0.021 |
| <b>O88941</b>                    | Mannosyl-oligosaccharide glucosidase                       | 12 | 1.13 | 0.13 | 0.89 | 0.10 | 0.79  | 0.044 |
| <b>P11507</b>                    | Sarcoplasmic/endoplasmic reticulum calcium ATPase 2        | 30 | 1.01 | 0.10 | 0.81 | 0.07 | 0.80  | 0.028 |
| <b>Q7TQ16</b>                    | Cytochrome b-c1 complex subunit 8                          | 4  | 0.99 | 0.06 | 0.80 | 0.06 | 0.81  | 0.010 |
| <b>P35738</b>                    | 2-oxoisovalerate dehydrogenase subunit beta, mitochondrial | 13 | 1.23 | 0.12 | 1.03 | 0.05 | 0.84  | 0.039 |
| <b>B2RYT9</b>                    | Translational activator of cytochrome c oxidase 1          | 3  | 1.10 | 0.10 | 0.93 | 0.05 | 0.84  | 0.043 |
| <b>Q62920</b>                    | PDZ and LIM domain protein 5                               | 5  | 1.00 | 0.03 | 0.93 | 0.03 | 0.93  | 0.019 |
| <b>Proteins increased at 96h</b> |                                                            |    |      |      |      |      |       |       |
| <b>P04906</b>                    | Glutathione S-transferase P                                | 12 | 0.26 | 0.22 | 3.37 | 1.12 | 12.94 | 0.002 |
| <b>P38918</b>                    | Aflatoxin B1 aldehyde reductase member 3                   | 42 | 0.20 | 0.17 | 2.42 | 0.14 | 11.89 | 0.002 |
| <b>P05982</b>                    | NAD(P)H dehydrogenase [quinone] 1                          | 8  | 0.50 | 0.12 | 3.08 | 2.86 | 6.14  | 0.044 |
| <b>O70199</b>                    | UDP-glucose 6-dehydrogenase                                | 38 | 0.32 | 0.10 | 1.82 | 0.75 | 5.76  | 0.001 |
| <b>P07687</b>                    | Epoxide hydrolase 1                                        | 54 | 0.40 | 0.19 | 2.11 | 0.48 | 5.32  | 0.004 |
| <b>P04903</b>                    | Glutathione S-transferase alpha-2                          | 51 | 0.54 | 0.23 | 2.46 | 0.87 | 4.58  | 0.005 |
| <b>O89049</b>                    | Thioredoxin reductase 1, cytoplasmic                       | 17 | 0.42 | 0.29 | 1.57 | 0.29 | 3.78  | 0.026 |
| <b>P08430</b>                    | UDP-glucuronosyltransferase 1-6                            | 40 | 0.58 | 0.23 | 2.06 | 0.36 | 3.52  | 0.003 |
| <b>Q9Z0U5</b>                    | Aldehyde oxidase                                           | 52 | 0.68 | 0.20 | 2.21 | 0.58 | 3.23  | 0.002 |
| <b>P05370</b>                    | Glucose-6-phosphate 1-dehydrogenase                        | 15 | 0.38 | 0.22 | 1.20 | 0.33 | 3.13  | 0.028 |
| <b>P13383</b>                    | Nucleolin                                                  | 21 | 0.47 | 0.15 | 1.43 | 0.11 | 3.07  | 0.001 |
| <b>Q62651</b>                    | Delta(3,5)-Delta(2,4)-dienoyl-CoA isomerase, mitochondrial | 17 | 0.62 | 0.20 | 1.76 | 0.44 | 2.83  | 0.005 |
| <b>P48508</b>                    | Glutamate--cysteine ligase regulatory subunit              | 9  | 0.68 | 0.26 | 1.74 | 0.31 | 2.57  | 0.021 |
| <b>P23965</b>                    | Enoyl-CoA delta isomerase 1, mitochondrial                 | 18 | 0.59 | 0.37 | 1.46 | 0.30 | 2.50  | 0.046 |
| <b>P18437</b>                    | Non-histone chromosomal protein HMG-17                     | 3  | 0.51 | 0.22 | 1.26 | 0.52 | 2.49  | 0.037 |

|               |                                                       |     |      |      |      |      |      |       |
|---------------|-------------------------------------------------------|-----|------|------|------|------|------|-------|
| <b>Q9Z2Y0</b> | Glycine N-acyltransferase-like protein Keg1           | 6   | 0.79 | 0.21 | 1.94 | 0.24 | 2.45 | 0.003 |
| <b>O35547</b> | Long-chain-fatty-acid--CoA ligase 4                   | 9   | 0.78 | 0.11 | 1.88 | 0.58 | 2.40 | 0.003 |
| <b>P51647</b> | Retinal dehydrogenase 1                               | 29  | 0.85 | 0.45 | 2.00 | 0.05 | 2.35 | 0.040 |
| <b>Q99PS8</b> | Histidine-rich glycoprotein                           | 9   | 1.03 | 0.33 | 2.41 | 0.76 | 2.34 | 0.027 |
| <b>P13084</b> | Nucleophosmin                                         | 14  | 0.51 | 0.21 | 1.17 | 0.03 | 2.29 | 0.036 |
| <b>P17475</b> | Alpha-1-antitrypsin                                   | 39  | 0.47 | 0.18 | 1.08 | 0.28 | 2.28 | 0.022 |
| <b>P13221</b> | Aspartate aminotransferase, cytoplasmic               | 30  | 0.51 | 0.20 | 1.15 | 0.05 | 2.26 | 0.016 |
| <b>Q3B8Q1</b> | Nucleolar RNA helicase 2                              | 7   | 0.48 | 0.20 | 1.06 | 0.16 | 2.21 | 0.021 |
| <b>Q64633</b> | UDP-glucuronosyltransferase 1-7                       | 23  | 0.72 | 0.20 | 1.58 | 0.26 | 2.20 | 0.009 |
| <b>Q9EQS0</b> | Transaldolase                                         | 15  | 0.73 | 0.09 | 1.58 | 0.60 | 2.18 | 0.011 |
| <b>O35821</b> | Myb-binding protein 1A                                | 15  | 0.53 | 0.17 | 1.16 | 0.11 | 2.17 | 0.010 |
| <b>P19468</b> | Glutamate--cysteine ligase catalytic subunit          | 22  | 0.87 | 0.17 | 1.74 | 0.13 | 2.01 | 0.002 |
| <b>P06761</b> | 78 kDa glucose-regulated protein                      | 112 | 0.69 | 0.25 | 1.37 | 0.23 | 1.99 | 0.029 |
| <b>Q6P6S9</b> | Ectonucleoside triphosphate diphosphohydrolase 5      | 12  | 0.79 | 0.26 | 1.55 | 0.40 | 1.96 | 0.026 |
| <b>P70619</b> | Glutathione reductase (Fragment)                      | 8   | 0.68 | 0.17 | 1.31 | 0.32 | 1.94 | 0.019 |
| <b>Q6P747</b> | Heterochromatin protein 1-binding protein 3           | 4   | 0.91 | 0.19 | 1.75 | 0.51 | 1.93 | 0.019 |
| <b>P18886</b> | Carnitine O-palmitoyltransferase 2, mitochondrial     | 21  | 0.84 | 0.19 | 1.59 | 0.48 | 1.89 | 0.037 |
| <b>P63102</b> | 14-3-3 protein zeta/delta                             | 26  | 0.63 | 0.11 | 1.17 | 0.07 | 1.85 | 0.002 |
| <b>Q5M827</b> | Pirin                                                 | 3   | 0.78 | 0.33 | 1.45 | 0.20 | 1.85 | 0.048 |
| <b>P48721</b> | Stress-70 protein, mitochondrial                      | 67  | 0.75 | 0.14 | 1.39 | 0.32 | 1.84 | 0.013 |
| <b>P31210</b> | 3-oxo-5-beta-steroid 4-dehydrogenase                  | 51  | 1.07 | 0.22 | 1.95 | 0.18 | 1.83 | 0.007 |
| <b>P41777</b> | Nucleolar and coiled-body phosphoprotein 1            | 4   | 0.65 | 0.19 | 1.18 | 0.21 | 1.82 | 0.044 |
| <b>Q6URK4</b> | Heterogeneous nuclear ribonucleoprotein A3            | 20  | 0.56 | 0.07 | 1.02 | 0.25 | 1.82 | 0.009 |
| <b>P63039</b> | 60 kDa heat shock protein, mitochondrial              | 161 | 0.87 | 0.30 | 1.58 | 0.22 | 1.82 | 0.027 |
| <b>P97584</b> | Prostaglandin reductase 1                             | 16  | 0.88 | 0.10 | 1.58 | 0.42 | 1.80 | 0.015 |
| <b>Q68FR9</b> | Elongation factor 1-delta                             | 19  | 0.75 | 0.20 | 1.35 | 0.43 | 1.79 | 0.040 |
| <b>P11442</b> | Clathrin heavy chain 1                                | 103 | 0.77 | 0.10 | 1.36 | 0.53 | 1.78 | 0.037 |
| <b>P61980</b> | Heterogeneous nuclear ribonucleoprotein K             | 27  | 0.78 | 0.26 | 1.38 | 0.31 | 1.77 | 0.038 |
| <b>P04785</b> | Protein disulfide-isomerase                           | 89  | 0.89 | 0.30 | 1.57 | 0.32 | 1.76 | 0.046 |
| <b>P70580</b> | Membrane-associated progesterone receptor component 1 | 18  | 0.87 | 0.20 | 1.51 | 0.25 | 1.74 | 0.015 |
| <b>Q9Z2G8</b> | Nucleosome assembly protein 1-like 1                  | 5   | 0.72 | 0.14 | 1.25 | 0.15 | 1.73 | 0.011 |
| <b>P24368</b> | Peptidyl-prolyl cis-trans isomerase B                 | 14  | 0.74 | 0.20 | 1.27 | 0.30 | 1.72 | 0.045 |

|               |                                                         |    |      |      |      |      |      |        |
|---------------|---------------------------------------------------------|----|------|------|------|------|------|--------|
| <b>O35814</b> | Stress-induced-phosphoprotein 1                         | 24 | 0.72 | 0.16 | 1.23 | 0.31 | 1.71 | 0.029  |
| <b>P05182</b> | Cytochrome P450 2E1                                     | 29 | 0.89 | 0.14 | 1.51 | 0.26 | 1.70 | 0.009  |
| <b>P04961</b> | Proliferating cell nuclear antigen                      | 4  | 0.41 | 0.07 | 0.69 | 0.16 | 1.70 | 0.021  |
| <b>P24268</b> | Cathepsin D                                             | 12 | 0.86 | 0.30 | 1.47 | 0.32 | 1.70 | 0.046  |
| <b>P10960</b> | Sulfated glycoprotein 1                                 | 14 | 0.60 | 0.11 | 1.02 | 0.19 | 1.68 | 0.013  |
| <b>Q6AXS5</b> | Plasminogen activator inhibitor 1 RNA-binding protein   | 12 | 0.72 | 0.16 | 1.21 | 0.29 | 1.66 | 0.039  |
| <b>P62752</b> | 60S ribosomal protein L23a                              | 8  | 0.78 | 0.12 | 1.26 | 0.07 | 1.62 | 0.004  |
| <b>P11232</b> | Thioredoxin                                             | 7  | 0.69 | 0.12 | 1.11 | 0.05 | 1.60 | 0.009  |
| <b>P17178</b> | Sterol 26-hydroxylase, mitochondrial                    | 13 | 1.01 | 0.13 | 1.61 | 0.27 | 1.60 | 0.008  |
| <b>P19945</b> | 60S acidic ribosomal protein P0                         | 24 | 0.68 | 0.12 | 1.08 | 0.16 | 1.59 | 0.017  |
| <b>Q9ER34</b> | Aconitate hydratase, mitochondrial                      | 46 | 0.78 | 0.23 | 1.23 | 0.08 | 1.58 | 0.029  |
| <b>Q1JU68</b> | Eukaryotic translation initiation factor 3 subunit A    | 23 | 0.66 | 0.17 | 0.98 | 0.08 | 1.50 | 0.041  |
| <b>Q641Y8</b> | ATP-dependent RNA helicase DDX1                         | 12 | 0.73 | 0.13 | 1.09 | 0.15 | 1.50 | 0.025  |
| <b>P08082</b> | Clathrin light chain B                                  | 3  | 0.67 | 0.13 | 1.01 | 0.09 | 1.50 | 0.022  |
| <b>P38656</b> | Lupus La protein homolog                                | 7  | 0.83 | 0.16 | 1.23 | 0.21 | 1.49 | 0.039  |
| <b>P62919</b> | 60S ribosomal protein L8                                | 11 | 0.79 | 0.17 | 1.18 | 0.19 | 1.49 | 0.040  |
| <b>Q63797</b> | Proteasome activator complex subunit 1                  | 26 | 0.81 | 0.15 | 1.19 | 0.17 | 1.48 | 0.031  |
| <b>P62161</b> | Calmodulin                                              | 20 | 0.78 | 0.14 | 1.15 | 0.13 | 1.48 | 0.024  |
| <b>O88600</b> | Heat shock 70 kDa protein 4                             | 28 | 0.73 | 0.13 | 1.07 | 0.05 | 1.47 | 0.011  |
| <b>O35244</b> | Peroxiredoxin-6                                         | 32 | 0.87 | 0.20 | 1.27 | 0.11 | 1.46 | 0.045  |
| <b>P07151</b> | Beta-2-microglobulin                                    | 3  | 0.81 | 0.10 | 1.17 | 0.17 | 1.45 | 0.012  |
| <b>Q68FR6</b> | Elongation factor 1-gamma                               | 21 | 0.73 | 0.08 | 1.05 | 0.24 | 1.44 | 0.044  |
| <b>P48679</b> | Prelamin-A/C                                            | 35 | 0.78 | 0.07 | 1.12 | 0.25 | 1.43 | 0.043  |
| <b>Q9EPH8</b> | Polyadenylate-binding protein 1                         | 24 | 0.82 | 0.14 | 1.15 | 0.05 | 1.40 | 0.022  |
| <b>Q5M875</b> | 17-beta-hydroxysteroid dehydrogenase 13                 | 22 | 1.09 | 0.17 | 1.51 | 0.14 | 1.39 | 0.024  |
| <b>Q05096</b> | Myosin-Ib                                               | 94 | 1.03 | 0.04 | 1.42 | 0.01 | 1.38 | <0.001 |
| <b>P14942</b> | Glutathione S-transferase alpha-4                       | 12 | 0.99 | 0.12 | 1.37 | 0.23 | 1.38 | 0.035  |
| <b>P04256</b> | Heterogeneous nuclear ribonucleoprotein A1              | 18 | 0.86 | 0.02 | 1.15 | 0.20 | 1.34 | 0.019  |
| <b>P25113</b> | Phosphoglycerate mutase 1                               | 20 | 0.92 | 0.10 | 1.23 | 0.23 | 1.33 | 0.048  |
| <b>P02401</b> | 60S acidic ribosomal protein P2                         | 31 | 0.71 | 0.09 | 0.93 | 0.11 | 1.31 | 0.042  |
| <b>B5DFC8</b> | Eukaryotic translation initiation factor 3 subunit C    | 14 | 0.85 | 0.12 | 1.12 | 0.08 | 1.31 | 0.032  |
| <b>Q9Z0V6</b> | Thioredoxin-dependent peroxide reductase, mitochondrial | 10 | 0.87 | 0.13 | 1.13 | 0.10 | 1.30 | 0.045  |
| <b>P62853</b> | 40S ribosomal protein S25                               | 9  | 0.76 | 0.12 | 0.97 | 0.05 | 1.27 | 0.045  |
| <b>Q3T1J1</b> | Eukaryotic translation initiation factor 5A-1           | 13 | 0.84 | 0.08 | 1.03 | 0.04 | 1.23 | 0.016  |

|               |                                                         |    |      |      |      |      |      |       |
|---------------|---------------------------------------------------------|----|------|------|------|------|------|-------|
| <b>Q924S5</b> | Lon protease homolog,<br>mitochondrial                  | 27 | 1.01 | 0.10 | 1.23 | 0.10 | 1.22 | 0.033 |
| <b>Q9ER24</b> | Ataxin-10                                               | 4  | 0.91 | 0.08 | 1.10 | 0.05 | 1.21 | 0.022 |
| <b>Q4G061</b> | Eukaryotic translation<br>initiation factor 3 subunit B | 15 | 0.85 | 0.09 | 1.03 | 0.06 | 1.21 | 0.040 |
| <b>P61314</b> | 60S ribosomal protein L15                               | 7  | 0.91 | 0.11 | 1.10 | 0.03 | 1.21 | 0.041 |
| <b>Q63584</b> | Transmembrane emp24<br>domain-containing protein<br>10  | 11 | 0.90 | 0.07 | 1.08 | 0.03 | 1.20 | 0.014 |



**Supplementary Table 2:** Principle Component Analysis PC1 vs PC4 identifies a group of proteins which are highly expressed in rat livers after four daily doses of APAP (96 h group) and are therefore candidate proteins for further exploration of adaptation

| <b>Accession</b> | <b>Name</b>                                   |
|------------------|-----------------------------------------------|
| <b>P04906</b>    | Glutathione S-transferase P                   |
| <b>P05982</b>    | NAD(P)H dehydrogenase [quinone] 1             |
| <b>P38918</b>    | Aflatoxin B1 aldehyde reductase member 3      |
| <b>P04903</b>    | Glutathione S-transferase alpha-2             |
| <b>P07687</b>    | Epoxide hydrolase 1                           |
| <b>Q9Z0U5</b>    | Aldehyde oxidase                              |
| <b>P05179</b>    | Cytochrome P450 2C7                           |
| <b>P06757</b>    | Alcohol dehydrogenase 1                       |
| <b>Q99PS8</b>    | Histidine-rich glycoprotein                   |
| <b>P50137</b>    | Transketolase                                 |
| <b>P08430</b>    | UDP-glucuronosyltransferase 1-6               |
| <b>O70199</b>    | UDP-glucose 6-dehydrogenase                   |
| <b>O35547</b>    | Long-chain-fatty-acid--CoA ligase 4           |
| <b>P48508</b>    | Glutamate--cysteine ligase regulatory subunit |
| <b>P31210</b>    | 3-oxo-5-beta-steroid 4-dehydrogenase          |
| <b>P04905</b>    | Glutathione S-transferase Mu 1                |
| <b>P05182</b>    | Cytochrome P450 2E1                           |
| <b>P05545</b>    | Serine protease inhibitor A3K                 |
| <b>P51647</b>    | Retinal dehydrogenase 1                       |
| <b>Q9Z2Y0</b>    | Glycine N-acyltransferase-like protein Keg1   |



|                                                                    |                                                                                                                                                                                                        |
|--------------------------------------------------------------------|--------------------------------------------------------------------------------------------------------------------------------------------------------------------------------------------------------|
| Superpathway of Cholesterol Biosynthesis                           | ACAT1<br>CYP51A1<br>FDFT1<br>FDPS<br>HMGCS1<br>HMGCS2<br>IDI1<br>NSDHL                                                                                                                                 |
| PXR/RXR Activation                                                 | ALDH1A1<br>ALDH3A2<br>CYP1A2<br>CYP2C9<br>CYP3A4<br>GSTA1<br>GSTM1<br>GSTM2<br>HMGCS2<br>PRKAR1A<br>SLCO1B3<br>UGT1A1                                                                                  |
| Aldosterone Signaling in Epithelial Cells                          | AHCY<br>HSP90AA1<br>HSP90AB1<br>HSP90B1<br>HSPA1A/HSPA1B<br>HSPA5<br>HSPA8<br>HSPA9<br>HSPB1<br>HSPD1<br>HSPE1<br>HSPH1<br>MAPK1                                                                       |
| Glutathione-mediated Detoxification                                | GSTA1<br>Gsta4<br>GSTA5<br>GSTM1<br>GSTM2<br>GSTO1<br>GSTP1<br>GSTT2/GSTT2B<br>MGST1                                                                                                                   |
| Acetone Degradation I (to Methylglyoxal)                           | CYP1A2<br>CYP2C18<br>CYP2C9<br>CYP2D6<br>CYP2E1<br>CYP3A4<br>CYP4F8<br>CYP51A1                                                                                                                         |
| Bupropion Degradation                                              | CYP1A2<br>CYP2C18<br>CYP2C9<br>CYP2D6<br>CYP2E1<br>CYP3A4<br>CYP4F8<br>CYP51A1                                                                                                                         |
| Aryl Hydrocarbon Receptor Signaling                                | ALDH1A1<br>ALDH3A2<br>ALDH4A1<br>ALDH5A1<br>CTSD<br>CYP1A2<br>GSTA1<br>GSTA5<br>GSTM1<br>GSTM2<br>GSTO1<br>GSTP1<br>GSTT2/GSTT2B<br>HSP90AA1<br>HSP90AB1<br>HSP90B1<br>HSPB1<br>MAPK1<br>MGST1<br>NQO1 |
| Mitochondrial L-carnitine Shuttle Pathway                          | ACSL1<br>ACSL4<br>ACSL5<br>CPT2<br>SLC27A2<br>SLC27A5                                                                                                                                                  |
| Thyroid Hormone Metabolism II (Via Conjugation and/or Degradation) | Sult1a1<br>SULT1B1<br>SULT1C3<br>UGT1A1<br>UGT1A4<br>UGT1A6<br>Ugt1a7c<br>Ugt2b                                                                                                                        |
| Fatty Acid Activation                                              | ACSL1<br>ACSL4<br>ACSL5<br>SLC27A2<br>SLC27A5                                                                                                                                                          |
| Bile Acid Biosynthesis, Neutral Pathway                            | AKR1D1<br>AMACR<br>BAAT<br>CYP27A1<br>CYP3A4<br>SCP2<br>SLC27A5                                                                                                                                        |
| Nicotine Degradation III                                           | ALB<br>AOX1<br>C4A/C4B<br>CYP1A2<br>CYP2C18<br>CYP2C9<br>CYP2D6<br>CYP2E1<br>CYP3A4<br>CYP4F8<br>CYP51A1<br>HPX<br>ITIH3<br>UGT1A1<br>UGT1A4<br>UGT1A6<br>Ugt1a7c<br>Ugt2b                             |

**Supplementary Table 4:** Transporters significantly changed in abundance over experimental timecourse compared to control data

| Time (h) | Acc.no. | ID       | fold change |
|----------|---------|----------|-------------|
| 48       | P12336  | GLUT-2   | -0.43       |
| 48       | P46720  | OATP-1   | -0.97       |
| 48       | Q9QZX8  | OATP-4   | -1.03       |
| 72       | P46720  | OATP-1   | -1.16       |
| 72       | P45380  | SAT-1    | -0.93       |
| 72       | P16970  | PMP70    | -0.96       |
| 96       | POC546  | SLC25A42 | -0.47       |

**Supplementary Figure 1:**

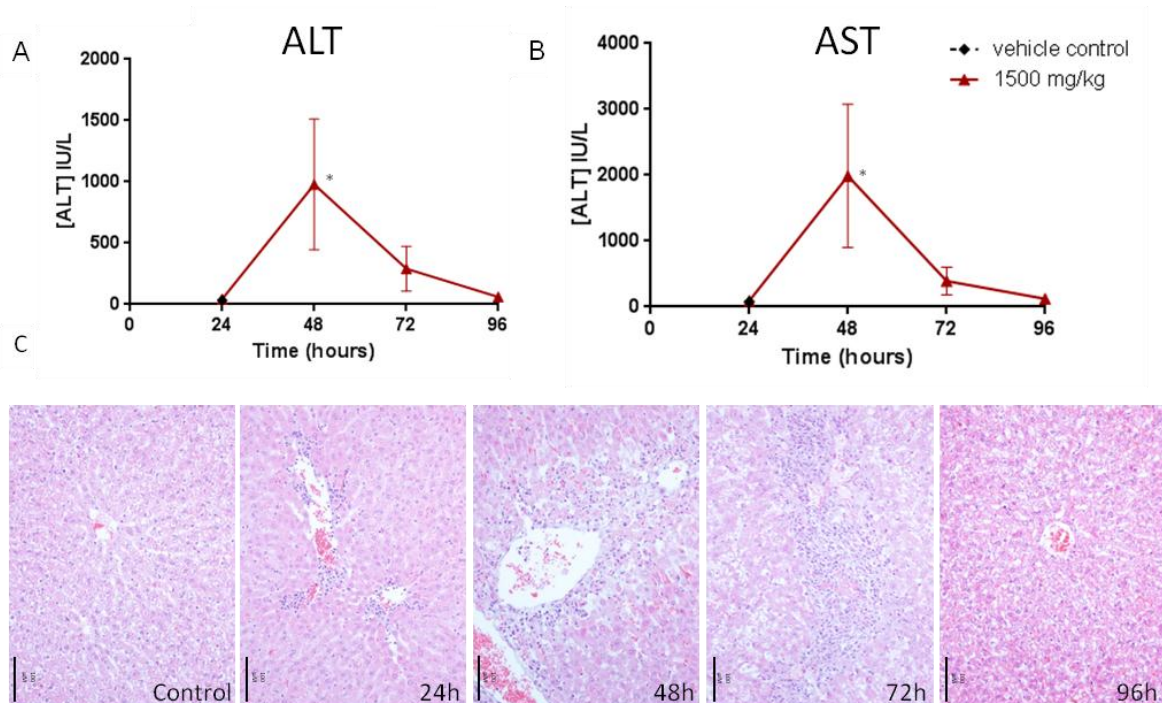

**Supplementary Figure 1 Legend:** Single dosed control study. Rats received a single 1500 mg/kg dose of APAP (p.o.) at 0h, with sacrifice at 24 h, 48 h, 72 h and 96 h post dose. Biomarkers of liver injury were significantly elevated at 48 h alone. Statistical analyses were performed using a one-way ANOVA with Tukey post-hoc test. \* indicates  $P < 0.05$ . Dose key: 1500 mg/kg, red triangles; 24h vehicle control, black diamond. A: ALT was measured in rat 24 h (43.7 IU/L, SEM 3.3), 48 h (979.6 IU/L, SEM 533.5,  $P = 0.0458$ ), 72 h (290.2 IU/L, SEM 184.3) and 96 h (61.6 IU/L, SEM 14.7). 24 h vehicle control values are also shown (34.2 IU/L, SEM 1.5). B: AST was measured in rat 24 h (91.5 IU/L, SEM 15.9), 48 h (1988.3 IU/L, SEM 1085.6,  $P = 0.0378$ ), 72 h (392.0 IU/L, SEM 211.8) and 96 h (120.8 IU/L, SEM 22.9). 24 h vehicle control values are also shown (74.8 IU/L, SEM 3.3). C: Formalin-fixed, paraffin embedded rat liver slices were stained with haematoxylin and eosin, showing progression of injury ( $n = 4$ , representative images shown). Scale bar represents 100 μm.
